1 Modeling Adaptive and Non-adaptive Responses of Populations to  
2 Environmental Change

3 Tim Coulson<sup>1</sup>, Bruce E Kendall<sup>2</sup>, Julia Barthold<sup>3</sup>, Floriane Plard<sup>4</sup>, Susanne Schindler<sup>5</sup>,  
4 Arpat Ozgul<sup>6</sup>, and Jean-Michel Gaillard<sup>7</sup>

5 <sup>1</sup>Department of Zoology, University of Oxford, South Parks Road, Oxford, OX1 3PS

6 <sup>2</sup>Bren School of Environmental Science & Management, 2400 Bren Hall, University of  
7 California, Santa Barbara, CA 93106-5131

8 <sup>3</sup>Max-Planck Odense Center on the Biodemography of Aging, Department of Public  
9 Health, J.B. Winslows Vej 9B, 5000 Odense C

10 <sup>4</sup>Department of Biology, Stanford University, Stanford, CA 94305-5020, USA

11 <sup>5</sup>Department of Evolutionary Biology and Environmental Studies, University of Zurich,  
12 Winterthurer Str. 190, CH-8057 Zurich

13 <sup>6</sup>Institute of Evolutionary Biology and Environmental Studies, Winterthurerstrasse 190,  
14 CH-8057 Zurich

15 <sup>7</sup>UMR 5558 Biometrie et Biologie Evolutive, Batiment G. Mendel, Universite Claude  
16 Bernard Lyon 1, 43 Boulevard du 11 Novembre 1918, 69622 Villeurbanne Cedex, France

17 *Manuscript elements:* Table 1, Table 2, Figure 1, figure 2, figure 3, figure 4, figure 5, online  
18 supplementary information (including figure S1, figure S2 and figure S3). All figures are to print  
19 in color.

20 *Keywords:* Population dynamics, evolutionary genetics, structured models, environmental change.

## 21 **Abstract**

22 Understanding how the natural world will be impacted by environmental change is one of the most  
23 pressing challenges facing humanity. Addressing this challenge is difficult because environmental  
24 change can generate both population level plastic and evolutionary responses, with plastic responses  
25 being either adaptive or non-adaptive. We develop an approach that links mechanistic quantitative  
26 genetic theory with data-driven structured models to allow prediction of population responses  
27 to environmental change via plasticity and adaptive evolution. After introducing general new  
28 theory, we construct a number of example models to demonstrate that evolutionary responses to  
29 environmental change will be considerably slower than plastic responses, that adaptive plasticity  
30 can accelerate population recovery to environmental change but that it slows the rate of adaptation  
31 to the new environment. Parameterization of the models we develop requires information on genetic  
32 and phenotypic variation and demography which will not always be available. We consequently  
33 develop a method based on the statistical analysis of temporal trends in model parameter values  
34 of examining whether the full machinery of the evolutionarily explicit models we develop will be  
35 needed to predict responses to environmental change, or whether simpler non-evolutionary models  
36 that are now widely constructed may be sufficient.

## 37 Introduction

38 Ecosystems from the deep ocean to the high arctic, from deserts to tropical forests are responding  
39 to environmental change. Understanding and predicting these responses is one of the most pressing  
40 issues currently facing humanity. For this reason, in the last quarter of a century, there has been  
41 considerable interest in developing ways to understand how the natural world will be affected by  
42 environmental change (Bossdorf et al., 2008; Dawson et al., 2011; Gilbert and Epel, 2009; Hoffmann  
43 and Sgrò, 2011; Ives, 1995; Lavergne et al., 2010; Wiens et al., 2009). We introduce a new, general  
44 approach combining insights from structured population modeling and evolutionary genetics that  
45 allows us to examine how adaptive evolution and plasticity contribute to the way that populations,  
46 and consequently the ecosystems in which they are embedded, respond to environmental change.

47 Environment change alters the expected demographic rates of individuals within a population  
48 (Chevin et al., 2010). For example, if environmental change reduced the probability of survival  
49 of all individuals within a population without impacting recruitment, then population size would  
50 decline (Caswell, 2001). Predicting the way populations will respond to environmental change  
51 consequently requires understanding how such change impacts demographic rates (Coulson et al.,  
52 2001). Individual differences in expected demographic rates within a population are ubiquitous,  
53 with some individuals having a greater propensity to survive or reproduce than others (Link et al.,  
54 2002). This heterogeneity across individuals is determined by phenotypic variation (Wilson and  
55 Nussey, 2010). For example, large individuals often have higher survival and recruitment rates  
56 compared to their smaller counterparts (e.g. Festa-Bianchet et al., 1998; Sedinger et al., 1995). To  
57 understand how environmental change influences demographic rates at the population level it is  
58 consequently necessary to know (i) the distribution of phenotypes within the population and (ii)  
59 their expected demographic rates in different environments (Ozgul et al., 2010).

60 Dynamic models of population responses to environmental change need to incorporate informa-  
61 tion not only on the associations between phenotypic traits and expected survival and reproduction  
62 in different environments, but also on the way that environmental variation influences phenotypic

63 development within individuals as they age, and the distribution of phenotypes among new born  
64 individuals recruiting to the population (Rees et al., 2014). In other words we need to understand  
65 the processes that determine individual phenotypic trajectories and resulting life histories. As well  
66 as environmental variation, genes also influence the way that phenotypes develop within individu-  
67 als (Cheverud et al., 1983), as can an individual's current phenotypic state (Badyaev and Martin,  
68 2000; Easterling et al., 2000). Parental phenotypes, parental genotypes and environmental variation  
69 can all influence the distribution of offspring phenotypes as can mating patterns (Baldwin, 1896;  
70 Charlesworth, 1994; Gavrillets and Scheiner, 1993; Lynch and Walsh, 1998; Monaghan, 2008). This  
71 complexity makes predicting population responses to environmental change challenging.

72 Adaptive evolution in response to environmental change occurs when selection – the association  
73 between phenotypes and expected survival and reproduction – results in a change in allele frequen-  
74 cies. Such genetic change can lead to change in the distribution of the phenotypes that influence  
75 survival and reproduction. However, phenotype distributions can respond to environmental change  
76 in the absence of adaptive evolution via plasticity. The ability for phenotype distributions to change  
77 in the absence of adaptive evolution is often genetically determined. Individuals can modify their  
78 own phenotypes, or those of their offspring, by altering their physiology, metabolism or behavior  
79 (Aubin-Horth and Renn, 2009; Richards, 2006). This is achieved by altering gene expression pat-  
80 terns by up and down regulating expression of particular genes, or even turning some genes off  
81 and others on (Snell-Rood et al., 2010). These effects that are not encoded in DNA are termed  
82 epigenetic effects.

83 Epigenetic responses to environmental change occur at the level of the individual. For them  
84 to leave a signature at the population level in the distribution of phenotypes, multiple individuals  
85 need to exhibit similar epigenetic responses to environmental change (Lande, 2009). When this hap-  
86 pens, populations are said to exhibit plastic responses. We distinguish between two types of plastic  
87 response – phenotypic plasticity (Scheiner, 1993) and epigenetic inheritance (Richards, 2006). Phe-  
88 notypic plasticity occurs when phenotype distributions change within surviving individuals due to  
89 epigenetic responses to a changing environment. In contrast, epigenetic inheritance occurs when a

90 change in the environment impacts the phenotype of offspring recruiting to the population (Blake  
91 and Watson, 2016). Epigenetic inheritance can be influenced by the environment the offspring find  
92 themselves when they become independent, or by their parents. For example, parents may provi-  
93 sion developing offspring (seeds or fetuses) with different resources or hormone levels as a function  
94 of their own phenotypes (Love et al., 2005). We refer to this environment as the developmental  
95 environment. Alternatively, once independent from their parents, offspring development may be  
96 determined by the ecological environment they experience (Solberg et al., 2004). In germinating  
97 seeds, the ecological environment could be determined by light, water and nutrient availability.

98 Any general framework that can be used to predict how environmental change will impact popu-  
99 lations consequently needs to incorporate how plasticity and genetic variation generates phenotypic  
100 variation, and how phenotypic variation impacts expected demography. We show how evolution-  
101 arily explicit integral projection models (IPMs) (Barfield et al., 2011; Childs et al., 2016; Coulson  
102 et al., 2011) provide a powerful framework within which to do this.

103 IPMs are a very flexible structured modeling tool. They project the dynamics of phenotype  
104 distributions as a function of expected survival and reproduction, the way the phenotype develops  
105 and the distribution of offspring phenotypes (Coulson, 2012; Easterling et al., 2000; Merow et al.,  
106 2014). Because IPMs track the dynamics of the entire distribution of phenotypic traits, numerous  
107 quantities of interest to ecologists and evolutionary biologists describing life history, population  
108 dynamic and phenotypic traits can be calculated from them (Childs et al., 2003; Coulson et al.,  
109 2011, 2010; Ellner and Rees, 2006; Rees et al., 2014; Steiner et al., 2014, 2012; Vindenes and  
110 Langangen, 2015). They consequently offer great potential to study eco-evolutionary feedbacks and  
111 dynamics (Coulson et al., 2011). However, most IPMs to date have been restricted to phenotypic  
112 variation in that they do not include genotype-phenotype maps (Merow et al., 2014). A small  
113 number of evolutionarily explicit IPMs have been developed. Coulson et al. (2011) used IPMs  
114 to track the distribution of body size and coat color in wolves, where coat color was determined  
115 by genotype at a single bi-allelic locus. They showed how environmental change would impact  
116 genotype frequencies at this locus. Barfield et al. (2011) and Childs et al. (2016) developed IPMs

117 of quantitative characters determined by a large number of unlinked loci of small effect. However,  
118 none of these models incorporates plasticity, nor different genetic influences on the phenotype at  
119 different ages, and these omissions limit their utility in predicting how populations will be influenced  
120 by environmental change (Chevin, 2015).

121 The aim of this paper is to introduce the general framework. We do this by (i) introducing  
122 two sex IPMs of phenotypic traits (Schindler et al., 2015, 2013; Traill et al., 2014a) that are not  
123 evolutionarily explicit, (ii) extending these models to include flexible genotype-phenotype maps that  
124 allow the role of adaptive evolution and plastic responses to environmental change to be examined,  
125 (iii) develop simple models to illustrate the framework. These models provide new results on the role  
126 of plasticity on evolutionary trajectories yet also allow us to retrieve key insights from evolutionary  
127 genetics.

## 128 **Methods and Results**

129 We start this section by introducing our general modelling approach. Our models consist of com-  
130 binations of functions, so we start by focusing on the biological processes these functions capture,  
131 and the way they combine to project the dynamics of phenotypic trait distributions. Our start-  
132 ing point is a model of the entire phenotype that we then extend to capture the dynamics of a  
133 phenotype consisting of genetic and environmentally determined components (Falconer, 1960). In  
134 order to construct models within our approach it is necessary to select forms for each function so  
135 we next turn our attention to this challenge. In the next sections we consider appropriate forms for  
136 functions that describe the dynamics of first the genetic component of the phenotype and second  
137 its environmental component. Next, we combine insights from these two sections to consider the  
138 dynamics of phenotypes consisting of both a genetic and environmental component. Finally, we  
139 consider how to identify circumstances when the full machinery of evolutionarily explicit IPMs are  
140 required, and when purely phenotypic ones will likely suffice.

## 141 Modeling approach

142 We use the term mechanistic to refer to functional forms that are derived from a mechanistic un-  
143 derstanding of a process. For example, Mendelian inheritance rules that are central to quantitative  
144 and population genetics are mechanistic in that the distribution of offspring genotypes or breeding  
145 values is known *a priori* from the parental genotypes or breeding values and the mating system  
146 (Barfield et al., 2011; Charlesworth, 1994). The term phenomenological is used to refer to func-  
147 tional forms that are identified from the statistical analysis of data (Crawley, 2007). We refer to  
148 functions, be they mechanistic or phenomenological, as  $f(\dots)$  where the dots inside parentheses  
149 define the variables the function  $f$  operates on. Parameters of a function are referenced by the  
150 same letter as the function, with subscripts defining the variable they influence. For example, a  
151 parameter  $f_{\mathcal{Z}}$  represents a parameter of function  $f$  that operates on variable  $\mathcal{Z}$ . We reserve  $I$  for  
152 the intercept of functions and  $a$  for age. Age is only included in models for species with overlapping  
153 generations. We use primes ( $'$ ) to represent a possible change in trait value from one time step to  
154 the next, either among surviving individuals, or between parents and their offspring. The notation  
155 we use (Table 1) is the standard notation used for IPMs (Coulson, 2012; Merow et al., 2014; Rees  
156 et al., 2014). We now turn to our approach.

157 Selection is the underpinning of adaptive evolution. It operates on the phenotype, and de-  
158 pending upon the genotype-phenotype map, can result in some genotypes having greater fitness  
159 than others. Under some circumstances such variation in genotype fitness can result in evolution  
160 defined as a change in allele frequencies. However, in other circumstances, for example when phe-  
161 notypes determined by heterozygote genotypes have greater fitness than phenotypes determined by  
162 homozygote genotypes, variation in genotype fitness does not necessarily result in allele frequency  
163 change (Charlesworth, 1994; Fisher, 1930).

164 In order to predict evolution and population dynamics it is necessary to understand: (i) the  
165 genotype-phenotype map at birth, (ii) how the phenotype develops, (iii) how the phenotype influ-  
166 ences survival at each developmental stage, (iv) the population's mating system and (v) patterns  
167 of mate choice based on the phenotype, as well as how these mate choice patterns influence (vi)

168 reproductive success, (vii) the distribution of genotypes among offspring and (viii) how all these  
 169 processes result in change in allele frequency from one generation to the next. Processes (i) to (vi)  
 170 (and consequently also (viii)) can be influenced by environmental variation. Dispersal can also be  
 171 an important driver of evolution. It can be added into the models we develop relatively easily, but  
 172 is not considered further here.

173 Our starting point is a phenotypic modeling approach that captures all demographic processes  
 174 that can contribute to the dynamics of phenotypes – survival, recruitment, development, inher-  
 175 itance, and mating patterns. Two sex phenotypic IPMs (Coulson et al., 2011; Schindler et al.,  
 176 2015, 2013; Traill et al., 2014a) capture processes (ii) to (vi) listed above but they do not include  
 177 genotypes, or consequently a genotype-phenotype map. Instead they include a function that maps  
 178 parental phenotype at time  $t$  to the phenotypes of recruiting offspring at time  $t+1$  (Easterling et al.,  
 179 2000). These functions are phenomenological in that no genetic mechanisms of inheritance are in-  
 180 cluded (Coulson et al., 2010; Smallegange and Coulson, 2013). Having introduced these models we  
 181 then extend them to include genotype-phenotype maps.

182 The model consists of two equations – one for females and one for males – with each equation  
 183 consisting of two additive components (Schindler et al., 2013). The first component deals with  
 184 survival and development of individuals already within the population, the second component deals  
 185 with reproduction and the generation of phenotypes among newborns entering the population,

$$\begin{aligned}
 N_f(\mathcal{Z}', t+1) &= \int [D_f(\mathcal{Z}'|\mathcal{Z}, \theta, t)S_f(\mathcal{Z}, \theta, t)N_f(\mathcal{Z}, t)]d\mathcal{Z} + \\
 &+ sC_{N_f N_m} \iint [H_f(\mathcal{Z}'|\mathcal{Z}_m, \mathcal{Z}_f, \theta, t)M(\mathcal{Z}_m, \mathcal{Z}_f, t) \dots \\
 &\dots N_f(\mathcal{Z}_f, t)N_m(\mathcal{Z}_m, t)R(\mathcal{Z}_f, \mathcal{Z}_m, \theta, t)]d\mathcal{Z}_m d\mathcal{Z}_f \\
 N_m(\mathcal{Z}', t+1) &= \int [D_m(\mathcal{Z}'|\mathcal{Z}, \theta, t)S_m(\mathcal{Z}, \theta, t)N_m(\mathcal{Z}, t)]d\mathcal{Z} + \\
 &+ (1-s)C_{N_f N_m} \iint [H_m(\mathcal{Z}'|\mathcal{Z}_m, \mathcal{Z}_f, \theta, t)M(\mathcal{Z}_m, \mathcal{Z}_f, t) \dots \\
 &\dots N_f(\mathcal{Z}_f, t)N_m(\mathcal{Z}_m, t)R(\mathcal{Z}_f, \mathcal{Z}_m, \theta, t)]d\mathcal{Z}_m d\mathcal{Z}_f \tag{1}
 \end{aligned}$$

186  $N_f(\mathcal{Z}', t+1)$  and  $N_m(\mathcal{Z}', t+1)$  are distributions of phenotypes  $\mathcal{Z}'$  in respectively females and males



187 at time  $t+1$ ;  $D_f(\mathcal{Z}'|\mathcal{Z}, \theta, t)$  and  $D_m(\mathcal{Z}'|\mathcal{Z}, \theta, t)$  are the probability of the phenotype developing from  
 188  $\mathcal{Z}$  to  $\mathcal{Z}'$  in respectively females and males between  $t$  and  $t+1$  as a function of environmental drivers  
 189  $\theta$ ;  $S_f(\mathcal{Z}, \theta, t)$  and  $S_m(\mathcal{Z}, \theta, t)$  are survival functions for females and males from  $t$  to  $t+1$  including  
 190 effects of phenotype and environmental drivers  $\theta$ ;  $s$  is the birth sex ratio measured as the proportion  
 191 of female offspring produced; and  $C_{N_f N_m}$  is a normalisation constant;  $H_f(\mathcal{Z}'|\mathcal{Z}_m, \mathcal{Z}_f, \theta, t)$  and  
 192  $H_m(\mathcal{Z}'|\mathcal{Z}_m, \mathcal{Z}_f, \theta, t)$  describe the probabilities of parents with phenotypes  $\mathcal{Z}_m$  and  $\mathcal{Z}_f$  respectively  
 193 producing male and female offspring with phenotype  $\mathcal{Z}'$  as a function of environmental drivers  $\theta$  at  
 194 time  $t$ ;  $M(\mathcal{Z}_m, \mathcal{Z}_f, t)$  captures the rate of mating between a male with phenotype  $\mathcal{Z}_m$  and a female  
 195 with phenotype  $\mathcal{Z}_f$ ;  $R(\mathcal{Z}_f, \mathcal{Z}_m, \theta, t)$  describes the expected litter size given a mating between a  
 196 male and a female with phenotypes  $\mathcal{Z}_m$  and  $\mathcal{Z}_f$  in environment  $\theta$  at time  $t$ . The survival, mating  
 197 and litter size functions determine the strength of selection on  $\mathcal{Z}$  (Schindler et al., 2015).

$C_{N_f N_m}$  can be used to capture a range of mating systems. For example, if we follow Schindler et al. (2013) and write,

$$C_{N_f N_m} = \frac{\int_{\mathcal{Z}_{f(\min)}}^{\infty} N_f(\mathcal{Z}_f, t) d\mathcal{Z}_f}{\int_0^{\infty} M(\mathcal{Z}_m, \mathcal{Z}_f, t) N_m(\mathcal{Z}_m, t) N_f(\mathcal{Z}_f, t) d\mathcal{Z}_m d\mathcal{Z}_f} \quad (2)$$

198 this adds a minimum size at which females can reproduce  $\mathcal{Z}_{f(\min)}$ . Depending on the mating be-  
 199 havior of the species,  $C_{N_f N_m}$  can be modified in various ways. For example, it can easily be altered  
 200 such that the number of birth events is determined by the number of the rarer sex, as in monog-  
 201 amous species. Mate choice can be influenced by specifying different functions for  $M(\mathcal{Z}_m, \mathcal{Z}_f, t)$ .  
 202 Schindler et al. (2013) demonstrate how it can be specified for random mating, assortative mating,  
 203 disassortative mating and size-selective mating.

In phenotypic IPMs, the phenotypic development functions are usually Gaussian probability functions (Easterling et al., 2000), e.g.:

$$D(\mathcal{Z}'|\mathcal{Z}, \theta, t) = \frac{1}{V^D(\mathcal{Z}, \theta, t) \sqrt{2\pi}} e^{-\frac{(\mathcal{Z}' - \mu^D(\mathcal{Z}, \theta, t))^2}{2V^D(\mathcal{Z}, \theta, t)^2}}. \quad (3)$$

204 The functions  $\mu^D(\mathcal{Z}, \theta, t)$  and  $V^D(\mathcal{Z}, \theta, t)$  respectively describe the expected value of  $\mathcal{Z}'$  given  $\mathcal{Z}$   
 205 and  $\theta$  at time  $t$  and the variance around  $\mu^D(\mathcal{Z}, \theta, t)$ . The Gaussian form can also be used for  
 206 development functions  $H(\mathcal{Z}'|\mathcal{Z}, \theta, t)$  with functions  $\mu^H(\dots)$  and  $V^H(\dots)$ .

207 We extend the two sex phenotypic IPM in equation (1) to include genotypes by writing the  
208 phenotype as a function  $\mathcal{Z} = z(\mathcal{G}, \mathcal{E})$ . We assume that  $\mathcal{Z}$  is a quantitative phenotype (i.e. measured  
209 in integer or real values). The genotypic value  $\mathcal{G}$  and environmental value  $\mathcal{E}$  describe the numerical  
210 contributions of the genetic and environmental components of the phenotype to an individual's  
211 phenotypic trait value. A simple map can consequently be written  $\mathcal{Z} = \mathcal{G} + \mathcal{E}$  (Falconer, 1960).

212  $\mathcal{G}$  is determined by genotype,  $g$ . When the map between  $g$  and  $\mathcal{G}$  is additive, the dynamics of  
213  $g$  and  $\mathcal{G}$  are identical. In contrast, when alleles interact, either at a locus (dominance) or across  
214 loci (epistasis) the map between  $g$  and  $\mathcal{G}$  is not additive, and the dynamics of  $\mathcal{G}$  are not identical  
215 to the dynamics of  $g$  (Fisher, 1930). In classical quantitative genetics it is assumed that the map  
216 between  $g$  and  $\mathcal{G}$  is additive (Falconer, 1960). Under these assumptions, it is not necessary to track  
217 the dynamics of  $g$  but evolution can be investigated by modeling the dynamics of just  $\mathcal{G}$ . When  
218 the map is additive we refer to the genetic component of the phenotype as a breeding value and  
219 denote it  $\mathcal{A}$ .

220 In classical population genetics, when the contribution of dominance and epistasis to evolution  
221 are often a key focus, it is necessary to track the dynamics of  $g$  and calculate  $\mathcal{G}$  from each  $g$ . The  
222 map between  $\mathcal{G}$  and the phenotype  $\mathcal{Z}$  is often assumed to be one-to-one (Hartl et al., 1997). In other  
223 words, the dynamics of  $\mathcal{G}$  and  $\mathcal{Z}$  are identical. In contrast, in quantitative genetics, the environment  
224 can influence the map between  $\mathcal{A}$  and  $\mathcal{Z}$  by influencing the value of the environmental component  
225 of the phenotype,  $\mathcal{E}$  (Falconer, 1960).  $\mathcal{E}$  can take different values in different individuals and can  
226 vary within individuals throughout life. The dynamics of the phenotype may not consequently  
227 represent the dynamics of the genotypic value  $\mathcal{A}$ . Statistical quantitative genetics is concerned  
228 with estimating moments of  $\mathcal{A}$  from  $\mathcal{Z}$  by correcting for environmental and individual variables  
229 that determine  $\mathcal{E}$  (Kruuk et al., 2008).

230 The genotype-phenotype map for phenotypic traits measured by biologists in free living pop-  
231 ulations is rarely known, and quantitative genetic assumptions are widely adopted (Kruuk et al.,  
232 2008). In particular, the infinitesimal model is assumed in which  $\mathcal{A}$  is determined by a large number  
233 of unlinked loci of small, additive, effect (Fisher, 1930). Until we have a better understanding of the

234 genetic architecture of complex traits, this approach is the most powerful available to investigate  
235 evolution in the wild (Kruuk et al., 2008). We consequently adopt it here.

236 We track the joint distribution of the two components  $N(\mathcal{A}, \mathcal{E}, t)$ . The utility of this is we  
237 can write expressions to describe the dynamics of each of the components separately, if necessary,  
238 before easily combining them to retrieve the dynamics of the phenotype. For  $\mathcal{Z} = \mathcal{A} + \mathcal{E}$  we can  
239 use a convolution (represented by the mathematical operator  $*$ ) between the two components of  
240 the phenotype to construct the phenotype (Barfield et al., 2011).

241 Phenotypic plasticity and epigenetic inheritance are captured in the dynamics of  $\mathcal{E}$ . In previous  
242 quantitative genetic IPMs  $\mathcal{E}$  is a randomly distributed variable that captures developmental noise  
243 (Barfield et al., 2011; Childs et al., 2016). A key contribution of this paper is to show how  $\mathcal{E}$  can be  
244 extended to also capture the biotic or abiotic environment as well as signatures of parental  $\mathcal{A}$ s and  
245  $\mathcal{E}$ s.  $\mathcal{E}$  is consequently defined as function of these drivers. There are various notations we could use  
246 to capture this. To be consistent with previous IPMs formulations (Coulson, 2012; Merow et al.,  
247 2014; Rees et al., 2014) we write  $\mathcal{E}'|\mathcal{E}, \mathcal{A}, \theta, t$  to capture the effects of  $\mathcal{E}$ ,  $\mathcal{A}$  and the environment  $\theta$   
248 at time  $t$  on  $\mathcal{E}'$ .

249 We now expand terms in our two-sex phenotypic IPM to include the genotype-phenotype map  
250  $\mathcal{Z} = z(\mathcal{A}, \mathcal{E})$ . We start with the bivariate distribution of  $\mathcal{A}$  and  $\mathcal{E}$  at time  $t$  among females that  
251 are already within the population at time  $t$ :  $N_f(\mathcal{A}, \mathcal{E}, t)$ . Viability selection now operates on this  
252 distribution. Viability selection is a simple multiplicative process describing the expected survival  
253 from  $t$  to  $t + 1$  as a function of the phenotype. We can consequently write,

$$N_f^s(\mathcal{A}, \mathcal{E}, t) = S_f(z(\mathcal{A}, \mathcal{E}), \theta, t)N_f(\mathcal{A}, \mathcal{E}, t). \quad (4)$$

When it comes to development, the genotype does not develop but remains fixed for life. However,  
 $\mathcal{A}$  can vary with age if different genes contribute to the phenotype at different ages (Wilson et al.,  
2005). In the section §**Adaptive Evolution** we consider the dynamics of age-structured breeding  
values. We focus here on the case where  $\mathcal{A}$  remains fixed for life but the environmental component

may vary,

$$N_f^s(\mathcal{A}, \mathcal{E}', t + 1) = \int D_f(\mathcal{E}' | (\mathcal{E}, \mathcal{A}, \theta), t) N_f^s(\mathcal{A}, \mathcal{E}, t) d\mathcal{E}. \quad (5)$$

254 Recruitment is dealt with in a similar way to survival in that it is a multiplicative process,

$$\begin{aligned} N^r((\mathcal{A}_m, \mathcal{E}_m), (\mathcal{A}_f, \mathcal{E}_f), t) &= M((\mathcal{A}_m, \mathcal{E}_m), (\mathcal{A}_f, \mathcal{E}_f), t) N(\mathcal{A}_m, \mathcal{E}_m, t) \dots \\ &\dots N(\mathcal{A}_f, \mathcal{E}_f, t) R(z(\mathcal{A}_m, \mathcal{E}_m), (z\mathcal{A}_f, \mathcal{E}_f), \theta, t). \end{aligned}$$

255 Note this is a recruitment related term of both male and female offspring that is not yet scaled by  
256 the normalization factor  $C_{N_f N_m}$ .

257 As with development, inheritance of the genetic and environmental components of the phenotype  
258 operates in different ways. For example, once mating pairs have formed and the number of offspring  
259 from each mating has been determined, the distribution of offspring genotypes is predictable. We  
260 can write the inheritance function for the genetic and environmental components of the phenotype  
261 as,

$$\begin{aligned} N_f^r(\mathcal{A}', \mathcal{E}', t + 1) &= sC_{N_f N_m} \iiint H_f(\mathcal{A}' | (\mathcal{A}_m, \mathcal{A}_f), \mathcal{E}' | (\mathcal{E}_m, \mathcal{E}_f, \theta, t)) \dots \\ &\dots N^r((\mathcal{A}_m, \mathcal{E}_m), (\mathcal{A}_f, \mathcal{E}_f), t) d\mathcal{A}_m d\mathcal{E}_m d\mathcal{A}_f d\mathcal{E}_f \end{aligned} \quad (6)$$

then,

$$N_f(\mathcal{A}', \mathcal{E}', t + 1) = N_f^r(\mathcal{A}', \mathcal{E}', t + 1) + N_f^s(\mathcal{A}, \mathcal{E}', t + 1). \quad (7)$$

262 The same logic applies to the production of male offspring.

We can construct the phenotype from the two components  $\mathcal{A}'$  and  $\mathcal{E}'$ , e.g.

$$N_f(\mathcal{Z}', t + 1) = \int_{\Omega_{\mathcal{Z}'}} N_f^r(\mathcal{A}', \mathcal{E}', t + 1) d\mathcal{E}' d\mathcal{A}' + \int_{\Omega_{\mathcal{Z}'}} N_f^s(\mathcal{A}, \mathcal{E}', t + 1) d\mathcal{E}' \quad (8)$$

263 where  $\Omega_{\mathcal{Z}'}$  is the set of  $(\mathcal{A}', \mathcal{E}')$  values satisfying  $z(\mathcal{A}', \mathcal{E}') = \mathcal{Z}'$ . For the second integral in equation  
264 (8) we have  $z(\mathcal{A}, \mathcal{E}') = \mathcal{Z}'$  as the  $\mathcal{A}$  does not change within individuals and consequently has no  
265 prime.

266 The additivity assumption means that models of clonal inheritance can generate very similar  
267 predictions to models of two sexes, particularly if both males and females have similar demography.  
268 However, clonal models are simpler than two sex models (Lande, 1982). We utilize this consequence  
269 of the additivity assumption and initially work with clonal reproduction to examine how the dy-  
270 namics of  $\mathcal{A}$  and  $\mathcal{E}$  influence population and phenotypic trait dynamics and adaptive evolution. We  
271 can write a clonal model,

$$\begin{aligned} N(\mathcal{A}, \mathcal{E}', t + 1) &= \int [D(\mathcal{E}'|\mathcal{E}, \mathcal{A}, \theta, t)S(z(\mathcal{A}, \mathcal{E}), \theta, t) + H(\mathcal{E}'|\mathcal{E}, \mathcal{A}, \theta, t) \dots \\ &\dots R(z(\mathcal{A}, \mathcal{E}), \theta, t)]N(\mathcal{A}, \mathcal{E}, t)d\mathcal{E} \end{aligned} \quad (9)$$

and

$$N(\mathcal{Z}', t + 1) = \int_{\omega'_{\mathcal{Z}}} N(\mathcal{A}, \mathcal{E}', t + 1)d\mathcal{E}'. \quad (10)$$

## 272 **Functional Forms**

273 In order to construct models it is necessary to identify forms for each of the functions described in  
274 the section above. These forms can differ for development and inheritance of  $\mathcal{A}$  and  $\mathcal{E}$ . To illustrate  
275 this we construct models for two limits. At one limit, all phenotypic variation is attributable to  
276 individual differences in  $\mathcal{A}$ . At the other limit, all individuals are genetically identical: they have  
277 the same  $\mathcal{A}$  and all individual variation is attributable to  $\mathcal{E}$ . This captures plasticity defined as  
278 the same genotype expressing different phenotypes in different environments. Having considered  
279 functional forms for these two limits we combine insights to construct models for phenotypes that  
280 are determined by  $\mathcal{A}$  and  $\mathcal{E}$ .

281 We primarily focus on linear functions for three reasons. First, they are easier to interpret and  
282 analyze than non-linear or non-additive forms. Second, when the environment changes impacting  
283 populations, responses, at least in the short term, can be well described with linear or linearized  
284 additive models (Cooch et al., 2001). Third, selection, the underpinning of evolution, is often  
285 directional and well described with linear or linearized associations between phenotypic traits and

286 components of fitness (Kingsolver et al., 2001). Parameters used for all models are provided in the  
287 Supplementary Information (SI §1.1), as are expressions to calculate key statistics used to show  
288 ecological and evolutionary change from model outputs (SI §1.2). Code to produce each figure is  
289 available on GitHub – <https://github.com/tncoulson/QG-meets-IPM-figure-code/tree/master>.

290 The environmental drivers  $\theta, t$  can be both abiotic and biotic. We focus primarily on a biotic  
291 driver, population density.

## 292 **Adaptive Evolution**

293 In this section we start with a simple clonal model of a univariate distribution of  $\mathcal{A}$ . We go on to  
294 show how genetic constraints can be imposed to slow, or stop, evolution. We then extend this clonal  
295 model in two ways: first, to include a multivariate, age-structured, distribution of  $\mathcal{A}$ , and second  
296 we relax the clonality assumption and compare the dynamics of clonal and sexual models. Finally,  
297 we introduce a new approximation to describe sexual reproduction and compare its performance  
298 with our initial approach.

299 Genotypes (and hence  $\mathcal{A}$ ) are determined at birth and remain fixed throughout life; neither  
300 are influenced by the environment. A consequence of this is the development function simplifies  
301 to a one-to-one map and can be removed from equation (5). We also start by considering clonal  
302 reproduction, which means that the inheritance function can also be removed as offspring genotype  
303 is identical to parental genotype. The dynamics of  $\mathcal{A}$  are consequently determined by the survival  
304 and reproduction functions – selection. In these models, as long as there is genetic variation within  
305 a population, and fitness is a monotonic function of genotype, evolution, defined as  $\mathbb{E}(N(\mathcal{A}, t+1)) =$   
306  $\mathbb{E}(N^r(\mathcal{A}, t)) \neq \mathbb{E}(N(\mathcal{A}, t))$  (where  $\mathbb{E}$  represents expectations) will occur.

In our first models we assume non-overlapping generations,

$$N(\mathcal{A}, t+1) = N^r(\mathcal{A}, t) = R(\mathcal{A}, t)N(\mathcal{A}, t).$$

307 and a linear reproduction function  $R(\mathcal{A}, t) = R_I + R_A\mathcal{A}$  with expected fitness increasing with the  
308 value of  $\mathcal{A}$ . Over the course of a simulation of 30 generations (SI §1.1 Model A), the population

309 never achieves an equilibrium structure or growth rate; it grows hyper-exponentially (Figure 1(a),  
310 black line) and the shape of the breeding value distribution continually changes location (Figure  
311 3(b), black line) and shape (Figure 1(b,d, black lines)). Linear selection only slowly erodes the  
312 genetic variance and skew (Figure 1(c,d)) and these changes lead to a slight slowing of the rate of  
313 change in the mean breeding value (Figure 1(b)) and the population growth rate (Figure 1(a)) each  
314 generation (the black lines are not linear).

315 In this model there are two ways to prevent the fitness function from generating change in the  
316 location of the distribution. First, the fitness function can take unimodal non-linear forms such as  
317  $R(\mathcal{A}, t) = R_I + R_{\mathcal{A}}\mathcal{A} + R_{\mathcal{A}^2}\mathcal{A}^2$  with  $R_{\mathcal{A}^2} < 0$  and  $R(\mathcal{A}, t)$  constrained to non-negative values. This  
318 generates stabilizing selection, with the mean breeding value being maintained at the value that  
319 maximizes fitness. Eventually, in this model, the breeding value distribution will achieve a trivial  
320 equilibrium – a Dirac delta function at this value. Second, continual change in the location of the  
321 distribution can be prevented by defining a maximum possible value for  $\mathcal{A}$  that cannot be exceeded.  
322 This captures a genetic constraint in the maximum possible character value – i.e. evolution has  
323 not evolved a genetic solution to creating a larger breeding value. In our models, this process can  
324 be captured by setting the abundance of  $N(\mathcal{A} > x, 1) = 0$  where  $x$  is the maximum possible trait  
325 value that evolution can achieve. Selection now pushes the breeding value distribution up to  $x$ ,  
326 again eventually achieving a trivial equilibrium captured by a Dirac delta function where all mass  
327 of the distribution is at  $\mathcal{A} = x$ .

328 Genetic constraints can also impact the transient dynamics of the breeding value distribution  
329 (Figure 1(a-d, red lines)). When we impose a genetic constraint (SI §1.1 model A with  $x = 11.5$ ),  
330 the genetic variance and skew evolve faster than when no genetic constraint is in place (Figure 1(c)  
331 and (d)). These more rapid changes result in a slowing in the evolution of the mean breeding value  
332 (Figure 1(b)), and of the population growth rate (Figure 1(a)).

333 Genetic covariances between traits can also capture genetic constraints and can also influence the  
334 outcome of evolution. We demonstrate this by developing an age-structured model.  $\mathcal{A}$  now becomes  
335 age-structured but is still inherited at birth. We construct a multivariate character  $\mathcal{A}$  describing the

336 breeding values that influence a character at each age (e.g.  $\mathcal{A}_1, \mathcal{A}_2, \dots, \mathcal{A}_n$  for breeding values at  
337 ages  $a = 1, 2, \dots, n$ ). If some of the same loci contribute to the genetic components of the character  
338 at different ages there is a genetic covariation across ages. The genetic variances within each age,  
339 and the covariances between ages, can be used to construct a  $\mathbf{G}$  matrix (Lande, 1979). Such age-  
340 structured  $\mathbf{G}$  matrices underpin the character-state approach of quantitative genetics (Lynch and  
341 Walsh, 1998). In the age-structured model that follows, we define a bivariate normal distribution  
342 with a known variance-covariance structure as our starting point and iterate this forwards (SI §1.1  
343 models B-D). We consider a simple case: a monocarpic biennial life cycle where individuals in their  
344 first year of life do not reproduce and all age 2 individuals die after reproduction. As with our  
345 model for a species with non-overlapping generations we assume clonal inheritance,

$$\begin{aligned} N(\mathcal{A}_1, 1, t+1) &= R(\mathcal{A}_2, 2, t)N(\mathcal{A}_2, 2, t) \\ N(\mathcal{A}_2, 2, t+1) &= S(\mathcal{A}_1, 1, t)N(\mathcal{A}_1, 1, t), \end{aligned} \tag{11}$$

where survival from age 1 to age 2 is specified as

$$S(\mathcal{A}_1, 1, t) = \frac{1}{1 + e^{-(S_{I,1} + S_{\mathcal{A}_1,1}\mathcal{A}_1)}} \tag{12}$$

346 with expected survival to age 2 being highest for larger values of  $\mathcal{A}_1$ . Although  $\mathcal{A}_2$  is not under  
347 direct selection, its distribution is modified by its covariance with  $\mathcal{A}_1$ .

$\mathcal{A}_2$ , the genotype at age 2, determines expected reproduction,

$$R(\mathcal{A}_2, 2, t) = e^{(R_{I,2} + R_{\mathcal{A}_2,2}\mathcal{A}_2)}. \tag{13}$$

348 Although  $\mathcal{A}_1$  does not directly influence reproduction, there is an association between it and repro-  
349 duction via its covariance with  $\mathcal{A}_2$ . All age 2 individuals die following reproduction in this model,  
350 although it is possible to extend our approach to any arbitrary number of ages.

351 The evolutionary dynamics that particular parameterizations of the fitness functions  $S(\mathcal{A}_1, 1, t)$   
352 and  $R(\mathcal{A}_2, 2, t)$  generate are dependent upon (i) the initial covariance between the characters and  
353 (ii) the fitness functions (SI §1.1 models B-D). Many parameterizations and initial covariances are



354 likely to generate evolutionary dynamics that may be biologically unrealistic. We demonstrate this  
355 with three contrasting parameterizations, considering size as our trait (Figure 1(e)-(g)). In the first  
356 example, (Figure 1(e) SI §1.1 model B), the two characters positively covary and experience selection  
357 in the same direction. Over the course of the simulation the average developmental trajectory has  
358 evolved with  $\mathcal{A}1$  evolving to be 1.76 times larger and  $\mathcal{A}2$  evolving to be 1.52 times larger. For a  
359 trait like body size, such a proportional change at different ages may be appropriate. In examples  
360 (Figure 1(f and g), SI §1.1 models C and D) the bivariate character evolves in contrasting ways. In  
361 (F),  $\mathcal{A}2$  evolves much faster than  $\mathcal{A}1$  while in (G)  $\mathcal{A}1$  evolves to be larger, while  $\mathcal{A}2$  evolves to be  
362 smaller. These simulations demonstrate that only a constrained set of fitness functions and genetic  
363 covariances will give biologically realistic evolutionary trajectories for the size-related traits that  
364 biologists often study.

365 We now return to a univariate model and examine the clonality assumption. How can the  
366 clonality assumption be relaxed, and what are the consequences? In sexually reproducing species,  
367 offspring inherit a mix of their parent's genomes. However, genetic segregation means that full  
368 siblings do not have the same genotype. When additivity is assumed, the breeding value of offspring  
369 is expected to be midway between parental breeding values. However, to obtain the distribution  
370 of offspring genotypes, the contribution of genetic segregation to variation among offspring needs  
371 to be taken into account. In two sex models, three steps are required to generate the distribution  
372 of offspring genotypes or breeding values given parental values. First, a distribution of mating  
373 pairs needs to be constructed. Second, the distribution of midpoint parental genotypes or breeding  
374 values given the distribution of mating pairs needs to be constructed. Third, segregation variance  
375 needs to be added to the distribution (Feldman and Cavalli-Sforza, 1979; Felsenstein, 1981; Turelli  
376 and Barton, 1994). The mating system and the segregation variance are related: when mating is  
377 assortative with respect to genotype, the segregation variance is small and siblings closely resemble  
378 one another and their parents. In contrast, when mating is disassortative with respect to genotype,  
379 siblings can differ markedly from one another, and the segregation variance is large.

Expressions have been derived for the segregation variance for the infinitesimal model where

it is assumed that traits are determined by a very large number of unlinked loci of small additive effects and mating is random (Fisher, 1930). The infinitesimal model is assumed in most empirical quantitative genetic analyses (Kruuk et al., 2008) and in our initial model. For random mating where both sexes have identical demographies, the distribution of offspring breeding values given parental breeding values is (Barfield et al., 2011):

$$N(\mathcal{A}, t + 1) = \left( \frac{N^r(\cdot, t)}{2} * \frac{N^r(\cdot, t)}{2} * \phi \left( \cdot, \frac{\sigma_r^2(\mathcal{A}, t)}{2} \right) \right) (\mathcal{A}), \quad (14)$$

380 where  $*$  represents convolution and  $\phi(\mathcal{A}, \sigma^2) = \frac{1}{\sqrt{2\pi\sigma^2}} \exp \left[ -\frac{\mathcal{A}^2}{\sigma^2} \right]$  is a Gaussian function with mean  
381 zero and variance  $\sigma^2$  representing the segregation variance.

If males and females have different demographies then they will have different distributions of genetic values after selection; we represent these as  $N_M^r(\mathcal{A}, t)$  and  $N_F^r(\mathcal{A}, t)$ , respectively. In this case, eq. (14) is replaced by

$$N(\mathcal{A}, t + 1) = \left( \frac{N_M^r(\cdot, t)}{2} * \frac{N_F^r(\cdot, t)}{2} * \phi \left( \cdot, \frac{\sigma_{r(M)}^2(\mathcal{A}, t) + \sigma_{r(F)}^2(\mathcal{A}, t)}{2} \right) \right) (\mathcal{A}), \quad (15)$$

382 where  $\sigma_{r(M)}^2(\mathcal{A}, t)$  and  $\sigma_{r(F)}^2(\mathcal{A}, t)$  are variances of the post-recruitment-selection genetic value of  
383 males and females, respectively. We do not superscript the  $r$ s with  $\sigma^2$  to avoid a notation making  
384 it appear  $\sigma$  is raised to some quantity  $2r$ .

385 The first two terms on the right hand side of equation (15) generates the distribution of ex-  
386 pected parental midpoint values; it ensures that the mean breeding value among offspring is midway  
387 between the two parental breeding values. However, because the parental distributions are halved,  
388 the variance of this distribution is half that of the parental distributions. The third term on the  
389 right hand side of equation (15) adds the segregation variance. For random mating, the variance  
390 is assumed to be normally distributed with a mean of 0 and a variance of half the additive genetic  
391 variance among the entire population when the population is at linkage equilibrium (Felsenstein,  
392 1981). We approximate this variance as half the additive genetic variance in the parental distribu-  
393 tion (Feldman and Cavalli-Sforza, 1979). This approach has already been incorporated into IPMs  
394 (Barfield et al., 2011; Childs et al., 2016).

395 We now run two simulations (Figure 2(a)-(d)) to examine differences in the predictions of clonal  
396 and sexual models. The first model assumes clonal inheritance and the second the convolution in  
397 Equation (15), with both models assuming a linear function  $R(\mathcal{Z}, t)$  (SI §1.1 model E). The two  
398 models predict slightly divergent dynamics. The reason for this is that equation (15) results in the  
399 skew and kurtosis in  $N_R(\mathcal{A}, t)$  is reduced at each time step in the sexual model compared to in the  
400 clonal model. If selection is exponential (and the starting distribution proportional to a Gaussian  
401 distribution) then there will be no difference between the two approaches. This is because a normal  
402 distribution multiplied by an exponential fitness function results in a normal distribution with an  
403 unchanged variance (Diaconis et al., 1979). These results suggest that insights from clonal models  
404 will approximate those from sexual models reasonably well, at least when males and females have  
405 similar demography.

406 Some authors have queried the use of Equation (3) as an approximation in IPMs to the inheri-  
407 tance convolution in Equation (15) used in models of sexually reproducing species (Chevin et al.,  
408 2010; Janeiro et al., in press). However, being able to construct inheritance functions for  $\mathcal{A}$  that  
409 are of the form of equation (3) would be useful as it would permit methods developed for two sex  
410 phenotypic IPMs to be applied to evolutionarily explicit IPMs (e.g. Schindler et al., 2015). Given  
411 Gaussian approximations frequently perform well in models of evolution (Turelli and Barton, 1994)  
412 we hypothesize that Gaussian inheritance functions may perform well in evolutionarily explicit  
413 IPMs. We consequently constructed a Gaussian inheritance function and compared results with  
414 those obtained from the convolution.

415 Equation (15) results in the mean and variance of the parental and offspring breeding value  
416 being the same. We can approximate this by ensuring that the function  $\mu^H(\mathcal{A}, t)$  passes through  
417 the coordinate  $x = \mathbb{E}(N_R(\mathcal{A}, t)), y = \mathbb{E}(N_R(\mathcal{A}, t))$  and that the variance  $V^H(\mathcal{A}, t) = \sigma^2(N_R(\mathcal{A}, t))$ .  
418 When both sexes have the same demography, we can write,

$$\begin{aligned}\mu^H(\mathcal{A}, t) &= (1 - \eta)\mathbb{E}_R(N_R(\mathcal{A}, t)) + \eta\mathcal{A} \\ V^H(\mathcal{A}, t) &= (1 - \eta)^2\sigma^2(N_R(\mathcal{A}, t))\end{aligned}\tag{16}$$

419 where  $\mathbb{E}$  and  $\sigma^2$  represent expectations and variances respectively and  $\eta$  represents the degree of  
420 assortative mating. When  $\eta = 1$  mating is entirely assortative, when  $\theta = 0.5$  mating is random  
421 and when  $\eta = 0$  mating is completely disassortative. An equation for the case when males and  
422 females have different demographics is provided in the SI §1.3. The approximation in Equation  
423 (16) will increase in accuracy as the distribution of mid-point parental breeding values becomes  
424 more Gaussian.

425 When we compared predictions from equations (15) and (16) with  $\eta = 0.5$  using the same model  
426 used to compare clonal and sexual life histories, results were indistinguishable (Figure 2(a)-(d)). This  
427 reveals that, for linear selection, Gaussian inheritance functions for  $\mathcal{A}$  perform remarkably well.

428 Our approximation can be used to examine the dynamical contributions of non-additive genetic  
429 processes to population responses to environmental change in a phenomenological manner. Fisher  
430 (1930) demonstrated that dominance variance can be treated as an offset, and in our models this  
431 would lower the intercept of the function  $\mu^H(\mathcal{G}, t)$  in equation (16). A consequence of this is that  
432 the mean of the offspring genotype is no longer equal to the mean of parental genotype and the  
433 dynamics of genotypes no longer exactly match the dynamics of alleles. We demonstrate this  
434 with a single locus-two allele model. When the effects of alleles are additive, the dynamics of the  
435 genotype captures the dynamics of alleles (Figure 2(e)). In contrast, when the heterozygote has  
436 higher fitness, allele frequencies do not change once the equilibrium is achieved. However, selection  
437 and inheritance alter genotype frequencies (Figure 2(f)). This effect of dominance variance can be  
438 phenomenologically capturing within an IPM by setting the intercept of the inheritance function  
439 for the genetic component of the phenotype to be less than  $\frac{\mathbb{E}_R(N_{R,\mathcal{A}}, t)}{2}$  – this imposes an offset that  
440 can reverse gains made by selection (Figure 2(g)). Because this offset is negative when dominance  
441 variance is operating, dominance variance will slow, or prevent, rates of evolutionary change. We  
442 could easily phenomenologically explore how a particular value of this offset impacts predicted  
443 dynamics, however, further work is required to relate different levels of dominance variance to  
444 specific values of the offset in our models.

445 Having shown how IPMs can be formulated to project forwards the dynamics of the genetic

446 component of the phenotype under a wide range of circumstances, we now turn our attention to  
447 the dynamics of the environmental component of the phenotype.

## 448 **Plasticity**

449 Plasticity is determined by the dynamics of  $\mathcal{E}$  and in particular in how  $\mathcal{E}$  is influenced by the  
450 ecological environment  $\theta$ . For this, we require a probability density function. We show in this  
451 section how different forms of plasticity can be incorporated into evolutionarily explicit IPMs, and  
452 explore the dynamics of some simple cases.

453 To capture plasticity in IPMs we need to model the probability of transition from  $\mathcal{E}$  at time  
454  $t$  to  $\mathcal{E}'$  at time  $t + 1$  as a function of the environment  $\theta$ . For most plastic traits we have a poor  
455 mechanistic understanding of development and inheritance patterns, and for that reason we use  
456 the Gaussian probability density function in Equation (3).

457 In quantitative genetics it is often assumed that the mean of  $\mathbb{E}(\mathcal{E}, t) = 0$  and any individual  
458 departures are purely random (Falconer, 1960). In equation 3 this requires the intercepts and slopes  
459 of the functions  $\mu^D(\dots)$  and  $\mu^H(\dots)$  to take the following values:  $\mu_I^H = 0$ ,  $\mu_I^D = 0$ ,  $\mu_{\mathcal{E}}^H = 1$  and  
460  $\mu_{\mathcal{E}}^D = 1$ . We relax this assumption and allow the mean (and variance) of  $\mathcal{E}$  to vary with time as  $\theta$   
461 varies by specifying particular forms for development and inheritance functions of  $\mathcal{E}$ .

462 Gaussian transition functions (equation 3) can be formulated to predictably modify moments  
463 of the distribution of  $\mathcal{E}$  from time  $t$  to time  $t + 1$ . For example, careful choice of intercepts and  
464 slopes of  $\mu^D \mathcal{E}, t$ ,  $\mu^H \mathcal{E}, t$ ,  $V^D \mathcal{E}, t$  and  $V^H \mathcal{E}, t$  can be used to predictably grow, or shrink, the variance  
465 of  $\mathcal{E}$  via either development or inheritance (SI §1.4). In addition, specific biological processes can  
466 be easily incorporated into the dynamics of  $\mathcal{E}$ : if the slopes  $\mu_{\mathcal{E}}^D \neq 0$  or  $\mu_{\mathcal{E}}^H \neq 0$  then there will  
467 be temporal autocorrelation in the value of  $\mathcal{E}$  among individuals, and between parents and their  
468 offspring. For example, if  $\mu_{\mathcal{E}}^D > 0$  then individuals with a relatively large value of  $\mathcal{E}$  at time  $t$   
469 will be expected to have a relatively large value of  $\mathcal{E}'$  at time  $t + 1$ . This property of development  
470 functions is useful as it allows some memory of  $\mathcal{E}$  across ages: if an individual has benefited from a  
471 particularly good set of circumstances at one age, any phenotypic consequences can persist to older

472 ages. In a similar vein, if  $\mu_{\mathcal{E}}^H > 0$  then a parent with a relatively large  $\mathcal{E}$  at time  $t$  will produce  
473 offspring with relatively large  $\mathcal{E}$ 's at time  $t + 1$ , a form of parental environmental effect (Nussey  
474 et al., 2007).

475 Deterministic IPMs incorporate probabilistic transitions when  $V^H(\mathcal{E}'|\mathcal{E}, \mathcal{A}, t) = 0$  and  $V^D(\mathcal{E}'|\mathcal{E}, \mathcal{A}, t) =$   
476 0. These probabilities do not vary from one time step to the next. In stochastic models these func-  
477 tions can include terms for an environmental driver  $\theta$ , such that the variation in trajectories changes  
478 with the environment. In evolutionarily explicit models, the variance in transition rates among dif-  
479 ferent values of  $\mathcal{E}$  can be made to depend upon  $\theta$ ,  $\mathcal{A}$  and their interaction (if desired). This means  
480 that individuals with specific values of  $\mathcal{A}$  can produce offspring with more variable values of  $\mathcal{E}$  (and  
481 consequently  $\mathcal{Z}$ ) in particular environments than individuals with other values of  $\mathcal{A}$ . This is an  
482 example of bet-hedging (Childs et al., 2010). We do not provide examples of bet-hedging in this  
483 paper, but instead focus on the incorporation of  $\theta$  into  $\mu^H(\mathcal{E}'|\mathcal{E}, \mathcal{A}, \theta, t)$  and  $\mu^D(\mathcal{E}'|\mathcal{E}, \mathcal{A}, \theta, t)$ .

484 Different formulations of  $\mu^H(\dots)$  and  $\mu^D(\dots)$  can be used to capture a variety of different  
485 forms of plasticity (Table 2). When  $\theta$  is incorporated as an additive effect, it acts to shift the  
486 intercept of these functions as  $t$  changes. This means that the environment influences all values  
487 of  $\mathcal{A}$  in the same manner. If  $\mathcal{Z} = \mathcal{A} + \mathcal{E}$  then  $\mathcal{Z}$  changes as a function of how  $\theta$  influences  $\mathcal{E}$  if  $\mathcal{A}$   
488 remains constant.  $\mathcal{A}$  remains constant when it does not vary within individuals as they age, or if  
489  $\mathcal{A}'$  in offspring is the same as  $\mathcal{A}$  in parents.

490 Interactions between  $\mathcal{E}$ ,  $\mathcal{A}$  and  $\theta$  are listed in Table 2. Each form describes a different type of  
491 reaction norm (Gavrilets and Scheiner, 1993). These forms allow  $\mathcal{E}$  to develop among individuals  
492 (phenotypic plasticity) or be inherited (epigenetic inheritance) as a function of an individual's  
493 breeding value  $\mathcal{A}$  and the environment  $\theta$  as well as the value of  $\mathcal{E}$  at time  $t$ .

494 Plasticity can be either adaptive or non-adaptive (Ghalambor et al., 2015), and both forms  
495 can be captured into our models. Adaptive plasticity enables populations to rapidly respond to an  
496 environmental change. For example, if environmental change reduces population size, then adaptive  
497 plasticity would result in a change to the mean of the phenotype via either phenotypic plasticity  
498 (the development function) or epigenetic inheritance (the inheritance function) that leads to an

499 increase in survival or recruitment rates. In contrast, non-adaptive plasticity does the opposite,  
500 potentially exacerbating the detrimental effects of environmental change.

501 We demonstrate this with an example of a simple IPM of a species with non-overlapping gen-  
502 erations:  $N(\mathcal{E}', t + 1) = \int H(\mathcal{E}'|\mathcal{E}, \theta, t)R(\mathcal{E}, t)N(\mathcal{E}, t)d\mathcal{E}$ . Because plasticity is defined as different  
503 breeding values  $\mathcal{A}$  or genotypes expressing a different phenotype  $\mathcal{Z}$  in different environments, our  
504 models assume all individuals have the same  $\mathcal{A}$  but that  $\mathcal{E}$ , and consequently  $\mathcal{Z}$ , is a function of the  
505 environment  $\theta$ . This means we can remove  $\mathcal{A}$  from the model. We assume a linear fitness function  
506 and a Gaussian inheritance function,

$$\begin{aligned}R(\mathcal{E}, t) &= R_I + R_{\mathcal{E}}\mathcal{E} + R_{\theta}\theta \\ \mu^H(\mathcal{E}, t) &= \mu_I^H + \mu_{\mathcal{E}}^H\mathcal{E} + \mu_{\theta}^H\theta \\ V^H(\mathcal{E}, t) &= V_I^H\end{aligned}$$

507 Next, we assume that the phenotypic trait is positively associated with expected recruitment such  
508 that  $R_{\mathcal{E}} > 0$ . We also assume that the environmental driver is positively associated with expected  
509 recruitment such that as  $\theta$  increases in value, fitness increases ( $R_{\theta} > 0$ ). This means that the  
510 population growth rate (in a density-independent model) or population size (in a density-dependent  
511 model) also increases with  $\theta$ . Now assume that a negative environmental perturbation decreases  
512  $\theta$  such that fitness decreases. For adaptive plasticity to counter this, the effect of the decrease in  
513  $\theta$  on epigenetic inheritance must increase the expected value of  $\mathcal{E}$ . In our simple model, this can  
514 only occur if  $\mu_{\theta}^H < 0$ . Then, as  $\theta$  declines,  $\mu_{\theta}^H\theta$  becomes less, and the value of  $\mu_I^H + \mu_{\theta}^H\theta$  becomes  
515 larger, increasing the mean of  $\mathcal{E}$  and fitness. In general, in additive linear models like this, if  $R_{\mathcal{E}}$   
516 and  $\mu_{\theta}^H$  take opposing signs then plasticity will be adaptive.

517 We develop three density-dependent models of a phenotype in a species with non-overlapping  
518 generations. In all models we define the fitness function to be  $R(\mathcal{E}, t) = R_I + R_{\mathcal{E}}\mathcal{E} + R_{n(t)}n(t)$  where  
519  $n(t) = \int N(\mathcal{E}, t)d\mathcal{E}$  and where  $R_{n(t)} < 0$ . In each model we define  $\mu^H(\mathcal{E}, t) = \mu_I^H + \mu_{\mathcal{E}}^H\mathcal{E} + \mu_{n(t)}^Hn(t)$ .  
520 We set in model (F)  $\mu_{n(t)}^H = 0$ ; in model (G)  $\mu_{n(t)}^H < 0$ ; and in model (H)  $\mu_{n(t)}^H > 0$  (SI §1.1).

521 The first model (F) does not include plasticity ( $\mu_{n(t)}^H = 0$ ), the second (G) captures adaptive

522 plasticity ( $\mu_{n(t)}^H < 0$  and  $R_{\mathcal{E}} > 0$ ), and the third (H) captures non-adaptive plasticity ( $\mu_{n(t)}^H >$   
523  $0$  and  $R_{\mathcal{E}} > 0$ ). Because the models are not age-structured and do not include development,  
524 plasticity operates via epigenetic inheritance (e.g. maternal environmental effects). The same  
525 logic can be extended to the development function in age-structured populations. In our examples,  
526 parameterizations are chosen so all models converge to the same value of carrying capacity,  $K$ . Once  
527 all three models have converged, we initially impose a one off perturbation. Model (G) regains the  
528 equilibrium first, followed by model (F), and then model (H) (Figure 3(a)) showing that adaptive  
529 plasticity allows the population to recover from a one off environmental perturbation much faster  
530 than when there is no plasticity, or plasticity is non-adaptive. Non-adaptivity plasticity significantly  
531 slows the rate at which the population can recover from a perturbation, with the initial population  
532 size pre-perturbation only re-attained after 80 generations.

533 Adaptive and non-adaptive plasticity also impact the way populations respond to permanent  
534 environmental change. We demonstrate this by running the same models (F), (G) and (H), except  
535 now we impose a constant change in fitness by permanently changing the intercept of the fitness  
536 function  $R_I$ . When we do this, the three models attain different equilibria population sizes (Figure  
537 3(b)) and different mean phenotypes (Figure 3(c)). Model (G) achieves a larger population size  
538 than the two other models. This buffering of the population against environmental change happens  
539 because adaptive phenotypic plasticity results in a change in the mean phenotype (Figure 2(c)) that  
540 increases the expected recruitment rate and asymptotic population size (Figure 2(b)). In contrast,  
541 non-adaptive plasticity exacerbates the consequences via a change in the mean phenotype that  
542 decreases fitness.

In contrast to our example models in the §**Adaptive Evolution**, the IPMs we have developed in this section, and indeed all non-genetic IPMs so far published, achieve an asymptotic population growth rate or equilibrium population size and a stable population structure. These IPMs have monotonically increasing or decreasing fitness functions: an increase in the character results in an increase in expected fitness. A consequence of this is that in these models the recruitment function acts to alter the location of the character distribution, and often also alter its shape (Wallace et al.,



2013). In other words,  $N_R(\mathcal{E}, t) - N(\mathcal{E}, t) \neq 0$ . In models of species with non-overlapping generations at equilibrium like those above, the inheritance function for  $\mathcal{E}$  must exactly reverse the changes to the character distribution generated by the fitness function. This means, for deterministic models, that

$$N_R(\mathcal{E}, t) - N(\mathcal{E}, t) = N(\mathcal{E}', t + 1) - N_R(\mathcal{E}, t). \quad (17)$$

543 This equality requires moments of parental and offspring characters to differ from one another if  
544  $N_R(\mathcal{E}, t) - N(\mathcal{E}, t) \neq 0$ . When there is a correlation between parental and offspring traits in the  
545 inheritance function for  $\mathcal{E}$  as in our models, the intercept of the inheritance function must take a  
546 value such that offspring characters are smaller than their parent's were at the same age (Coulson  
547 and Tuljapurkar, 2008).

548 IPMs for species with overlapping generations include development functions  $D(\mathcal{E}'|\mathcal{E}, a, t)$ .  
549 These functions can alter the size and distribution of the character distribution as individuals age.  
550 When generations are overlapping, and at equilibrium, changes to the location of the character  
551 distribution via survival, recruitment and development are all exactly countered by the inheritance  
552 functions  $H(\mathcal{X}'|\mathcal{X}, a, t)$ .

553 Coulson and Tuljapurkar (2008) showed that in red deer age-specific effects meant that young  
554 and old parents were incapable of producing offspring that had the same body weight as they did  
555 at birth. This mechanism reversed the effects of viability selection removing small individuals from  
556 the population early in life. The same process was observed in marmots (Ozgul et al., 2010) and  
557 Soay sheep (Ozgul et al., 2009) and may be general for body size in mammals.

558 We have now developed IPMs for (i)  $\mathcal{A}$  where we assumed all individuals had the same, constant,  
559  $\mathcal{E}$  and (ii)  $\mathcal{E}$  where we assumed all individuals had the same, constant,  $\mathcal{A}$ . We have shown how IPMs  
560 can capture a wide range of biological processes including adaptive and non-adaptive plasticity and  
561 correlated characters, and the circumstances when equilibria are achieved. We now link together  
562 these advances into models of the joint dynamics of the bivariate distribution  $N(\mathcal{A}, \mathcal{E}, t)$ .

## 563 **Models for the phenotype consisting of genetic and environmental components**

564 In the section we construct models where the character can be determined by a mixture of the  
565 genetic and environmental components. These models allow us to explore how adaptive evolution  
566 is influenced by plasticity.

567 We first develop a dynamic univariate version of the Breeders equation (Falconer, 1960) for a  
568 species with non-overlapping generations in a constant environment. In this case, the environmental  
569 component of the phenotype is assumed to be a consequence of developmental noise: individuals  
570 achieve their genetic potential, plus or minus a departure. At each generation within each breeding  
571 value, the distribution of the environmental component of the phenotype is assumed to be Gaussian  
572 with a mean of 0 and a constant variance (SI §1.1 Model I).

573 Our initial conditions are a bivariate Gaussian distribution of  $\mathcal{A}$  and  $\mathcal{E}$  which we iterate forwards  
574 for 300 time steps. Over time, the mean of the genetic component of the phenotype increases. In  
575 contrast, the mean of the environmental component is constant. The population grows hyper-  
576 exponentially (Figure 4(a)), the mean of the phenotype increases in value due to evolution (Figure  
577 4(a,d)) and the additive genetic variance is slowly eroded (Figure S2). Because the additive genetic  
578 variance is eroded, while the phenotypic variance remains constant, the heritability declines over  
579 time (Figure S2).

580 Our second model (SI §1.1 model J) has a negative density-dependent term in the fitness  
581 function. The phenotype evolves faster in this model than in our density-independent model (Figure  
582 4(b)). Population size grows nearly linearly in this model (Figure 4(d)), although the rate of increase  
583 does slow slightly each generation as genetic variation is eroded. The difference between the hyper-  
584 exponential (density-independent model) and nearly linear increases (density-dependent model)  
585 in population size explain the difference in the rates of evolution. This is because the selection  
586 differential that determines the rate of evolution (an emergent property from our model (Wallace  
587 et al., 2013)) has the population growth rate in its denominator. The population growth rate is  
588 smaller in the density-dependent model (just above unity) than in our density-independent one  
589 (it increases with time), and this leads to an increase in the strength of selection and the rate of

590 evolution (see also Pelletier and Coulson, 2012). A consequence of this is that the additive genetic  
591 variation and heritability tend towards zero faster than in the density-dependent model than in the  
592 density-independent one (Figure S2).

593 In our third model (SI §1.1 model K), negative density-dependence is included in the inheritance  
594 function for the environmental component of the phenotype as well as in the fitness function. This  
595 captures adaptive phenotypic plasticity. This results in a negative change in the mean of the  
596 environmental component of the phenotype with time (Figure 4(c)). This decrease is reflected in  
597 a change in the mean of the phenotype itself. Adaptive phenotypic plasticity leads to a decline in  
598 the population growth rate which results in a slight increase in the rate of evolution compared to  
599 the density-dependent model with no plasticity. However, the effect is not large and is only just  
600 distinguishable when comparing Figures 4(b) and (c).

601 In our final models (SI §1.1 models L to N) we examine how a one off perturbation influences  
602 the mean of the phenotype, its components and the population growth rate (Figure 4(g)-(l)) when  
603 there is no plasticity, adaptive plasticity and non-adaptive plasticity. We set the variance in the  
604 genetic and environmental component of the phenotype to be equal, giving an initial heritability of  
605  $h^2 = 0.5$ . In each model we allow the population to achieve the same equilibrium population size in  
606 the absence of selection ( $R_Z = 0$ ). We then impose a one off mortality event when 99% of individuals  
607 above the mean of the phenotype are killed off. At this point we also impose selection ( $R_Z = 0.1$ ). In  
608 all three models the mortality event results in a small change in the mean value of the phenotype  
609 (SI §1.5 for an explanation) (Figure 4(g)-(i), red lines) but a halving of population size (Figure  
610 4(j)-(l)). Adaptive plasticity results in the environmental component of the phenotype returning  
611 to its pre-perturbation value very quickly (Figure 4(g)-(i) blue lines). In contrast, although the  
612 perturbation causes a modest change in the mean of the genetic component of the phenotype,  
613 it takes  $> 10$  generations for evolution to reverse the change (Figure 4(g)-(i), black lines). This  
614 demonstrates that a strong selective effect can leave a large population dynamic impact, but leave  
615 only a small initial signature in the phenotype even when the trait is highly heritable.

616 Over the longer term, the dynamics of the all components of the phenotype, the phenotype

617 itself and the population dynamics all depend upon whether plasticity is adaptive or non-adaptive.  
618 Adaptive plasticity allows the population size to initially recover from the perturbation more quickly  
619 than when plasticity is absent or non-adaptive (Figure 4(j)-(l)). However, over a longer time  
620 period, non-adaptive plasticity results in the population achieving a larger size than when plasticity  
621 is absent or adaptive. These differences in population growth rate impact rates of evolution:  
622 immediately following the perturbation, the rate of evolution is greatest when plasticity is non-  
623 adaptive. However, the rate of evolution then increases when plasticity is adaptive (Figures S2 and  
624 S3). As with our previous models, the effects of adaptive and non-adaptive plasticity on rates of  
625 evolution are relatively small, but our results demonstrate how the two processes can interact.

## 626 **Signatures of evolution in phenomenological descriptions of mechanistic pro-** 627 **cesses**

628 The models in the previous section are quite complex. Do we always need to construct such  
629 evolutionarily explicit IPMs to predict population responses to environmental change, or can we  
630 rely on simpler, phenotypic IPMs? There are two reasons why it may be preferable to not construct  
631 evolutionarily explicit models. First, evolutionarily explicit IPMs are more complicated to construct  
632 than those that do not include genotypes or breeding values. Second, when data are unavailable  
633 to explicitly include breeding values into models (Traill et al., 2014*b*), the effects of evolution on  
634 predicted dynamics can still be explored by examining the consequences of perturbing parameter  
635 values (Traill et al., 2014*a*).

636 When evolution occurs within a system we would expect parameters in phenomenological in-  
637 heritance and development functions that are fitted to data to change with time. We can see this  
638 in Figure 1(e)-(g)). In these age-structured evolutionarily explicit models, the bivariate breeding  
639 value distribution (black contours) changes location as evolution occurs. We have fitted Gaussian  
640 development functions to these bivariate distributions at the beginning of each simulation and  
641 at the end (coloured image plots). The parameters that determine these development functions  
642 have clearly changed as the location of the functions have changed. A similar process occurs for

643 inheritance functions (not shown).

644 Numerous authors have previously noted this phenomenon in models of evolution. For exam-  
645 ple, in population genetic (Charlesworth, 1994) and eco-evolutionary models (Coulson et al., 2011;  
646 Yoshida et al., 2003) when genotype frequencies change with time, macroscopic, population level  
647 quantities like mean survival and recruitment also change; in adaptive dynamic models, as one  
648 strategy invades another, population level parameters inevitably change with strategy frequency  
649 over time (Metz et al., 1996); in quantitative genetic predator-prey models population level param-  
650 eters of both predators and prey vary over time leading to persistence of the interaction (Doebeli,  
651 1997); and in evolutionarily explicit IPMs parameters in inheritance functions have been shown  
652 to change with time as evolution progresses (Rees and Ellner, 2016). These insights are useful  
653 because if evolution is occurring within a system, then temporal trends in statistical estimates of  
654 model parameters would be expected – in other words, the effect of time, either additively or in  
655 an interaction with other parameters, would be expected in  $\mu^H(\mathcal{Z}, t)$ ,  $\mu^H(\mathcal{Z}, a, t)$  or  $\mu^D(\mathcal{Z}, t)$ . If  
656 marked temporal trends are observed in parameters in development and inheritance functions that  
657 cannot be attributed to a changing environmental driver, then evolutionarily explicit IPMs may be  
658 required.

659 What about parameters in fitness functions  $S(\mathcal{Z}, t)$  and  $R(\mathcal{Z}, t)$ ? Can any inferences from  
660 temporal trends in these parameters be made? In our approach, evolution of a focal trait would  
661 not be expected to alter statistical estimates of the fitness functions. In our models, evolution  
662 simply moves the location and shape of the phenotype distribution, but not its association with  
663 survival or recruitment.

664 We have identified one circumstance where evolution will leave a signature in the dynamics of  
665 fitness function parameters. Parameters in these functions can evolve in the presence of a genetically  
666 unmeasured correlated character that is also evolving. To demonstrate this we construct a model  
667 of a bivariate character, examine the dynamics it predicts, before exploring the consequences of  
668 failing to measure one of the characters.

We assume clonal inheritance such that dynamics of the characters are solely determined by a

bivariate fitness function,

$$R(\mathcal{A}, t) = R_I - R_{\mathcal{A}1}\mathcal{A}1 + R_{\mathcal{A}2}\mathcal{A}2 \quad (18)$$

669 The dynamics this model predicts depend upon the initial covariance between the two characters  
670 in a similar way to our age-structured model (equation 11). In our first example the two characters  
671 negatively covary, while in the second they positively covary (SI §1.1 for model parameterizations).  
672 The initial negative covariation allows rapid evolution, with population growth (Figure 5(a)), the  
673 mean of the characters (Figure 5(b)), their variances (Figure 5(c)) and the covariance between  
674 them (Figure 5(d)) evolving relatively quickly. In contrast, when the two characters positively  
675 covary, evolution is much slower, with the character means, variances and covariance changing  
676 much more slowly, even though the fitness functions are identical in each model (Figure 5(e)-(h)).

We now construct a fitness function for  $\mathcal{A}1$  when  $\mathcal{A}2$  is not measured. We start by defining mean fitness, an observable, as  $\mathbb{E}(R, t) = \mathbb{E}(R(\mathcal{A}, t))$ . The slope  $\hat{R}_{\mathcal{A}1, t}$  is given by,

$$\hat{R}_{\mathcal{A}1, t} = R_{\mathcal{A}1} + \frac{\sigma(\mathcal{A}1, \mathcal{A}2, t)}{\sigma^2(\mathcal{A}1, t)} R_{\mathcal{A}2}. \quad (19)$$

The intercept can be calculated in the usual manner by estimating the means of fitness and  $\mathcal{A}1$

$$\hat{R}_{I, t} = \mathbb{E}(R, t) - \hat{R}_{\mathcal{A}1, t} \mathbb{E}(\mathcal{A}1, t), \quad (20)$$

giving,

$$R(\mathcal{A}, t) = \hat{R}_{I, t} + \hat{R}_{\mathcal{A}1, t} \mathcal{A}1. \quad (21)$$

677 Equation (21) is what would be estimated from data if  $\mathcal{A}2$  were not measured and included in  
678 analyses (Kendall, 2015; Söderström and Stoica, 2002). It will correctly describe the consequences  
679 of selection on  $\mathcal{A}1$  even though  $\mathcal{A}2$  could be correlated with it. This is because the unmeasured  
680 correlated character impacts fitness whether it is measured or not, and consequently impacts the  
681 association between the focal character and fitness in its absence (Lande and Arnold, 1983). How-  
682 ever, the fitness function cannot provide accurate predictions over multiple generations when it is  
683 assumed that the fitness function is constant.

684 Over multiple generations the existence of unmeasured correlated characters will alter parame-  
685 ters in the fitness function in Equation (21) if selection alters genetic variances and covariances of  
686 measured and unmeasured correlated characters (Figure 5(i)-(j)). This is because  $\hat{R}_{I,t}$  and  $\hat{R}_{A1,t}$   
687 are both functions of the covariance between the two characters (equations 19-21). If selection  
688 alters this covariance, parameters  $\hat{R}_{I,t}$  and  $\hat{R}_{A1,t}$  will evolve with time. It is also why we use the  
689 subscript  $t$  for  $\hat{R}_{I,t}$  and  $\hat{R}_{A1,t}$ . Evidence of correlated characters under selection can consequently  
690 be inferred if parameters in fitness functions are observed to change with time in a system in the  
691 absence of a changing environmental driver. Note that a non-stationary unmeasured environmen-  
692 tal driver could also generate trends in parameter values in fitness functions in phenomenological  
693 IPMs.

## 694 Discussion

695 In this paper we develop an approach that allows prediction of how populations respond to envi-  
696 ronmental change via adaptive evolution and plasticity. We do this by incorporating mechanistic  
697 insights from evolutionary genetics into data-driven structured population models. Our approach is  
698 to split the phenotype into its genetic and environmental components and to model the dynamics  
699 of the genetic component with functions based on mechanistic understanding. In contrast, the  
700 dynamics of the environmental component of the phenotype, where mechanistic insight is lacking,  
701 are modeled with phenomenological functions that can be identified from the analysis of data.  
702 Our approach is appropriate for sexually reproducing or clonal species with either overlapping or  
703 non-overlapping generations.

## 704 Evolutionarily explicit structured models

705 IPMs are now a widely used tool in ecology and evolution because of their versatility and the ease  
706 with which they can be parameterized (Merow et al., 2014). All key statistics routinely estimated  
707 in population ecology, quantitative genetics, population genetics and life history describe some

708 aspect of a character distribution or its dynamics (Coulson et al., 2010). IPMs are so versatile  
709 because they describe the dynamics of these distributions. Characterization of the determinants  
710 of these statistics gained via sensitivity or elasticity analysis of models have provided insight into  
711 how ecological and evolutionary quantities that interest biologists are linked (Coulson et al., 2011).  
712 Although this logic was developed several years ago, there has recently been criticism that IPMs  
713 cannot be used to track the dynamics of multivariate breeding values expressed at different ages  
714 (Chevin, 2015; Janeiro et al., in press). Our paper addresses this criticism head-on—we show how  
715 IPMs can be formulated to capture such mechanistic complexity. In demonstrating this we develop  
716 a general modeling approach to capture population responses to environmental change. Having  
717 done this, we are now in a position to construct IPMs of quantitative characters and examine how  
718 perturbing the environment will influence not only the dynamics of the phenotype and its genetic  
719 and environmental components, but also the life history (Steiner et al., 2014, 2012) and population  
720 dynamics (Easterling et al., 2000).

721 The work we present here adds to a growing literature that explicitly incorporates evolution into  
722 structured models, and IPMs in particular. Within the population genetics paradigm, Charlesworth  
723 (1994) developed structured models with a one-to-one map between genotype and phenotype in  
724 age-structured populations. Building on this work, Coulson et al. (2011) showed how simple genetic  
725 architectures can be incorporated into IPMs, developing a model to explore how evolution at a single  
726 locus would occur simultaneously with phenotypic change of discrete and continuous characters,  
727 life history and population dynamics.

728 Working in the quantitative genetic paradigm, Lande (1982) derived age-structured models  
729 that tracked the dynamics of the mean of the additive genetic component of the phenotype ( $\mathbb{E}(\mathcal{A})$   
730 in our notation) and the mean of the phenotype itself ( $\mathbb{E}(\mathcal{Z})$ ). He assumed a constant genetic-  
731 variance covariance matrix and consequently weak selection and normally distributed character  
732 values—assumptions we relax. Barfield et al. (2011) extended Lande (1982)’s approach to track  
733 the dynamics of the entire character distribution and to stage-structured populations. In doing so,  
734 they developed a general, flexible approach to track the entire distributions of  $\mathcal{A}$  and  $\mathcal{Z}$ . Childs



735 et al. (2016) extended this approach to two sexes. Because  $\mathcal{A}$  is inherited with mechanistic rules  
736 that are not impacted by the environment, while inheritance and development of  $\mathcal{E}$  are plastic and  
737 can be impacted by the ecological environment (Falconer, 1960), it is difficult to incorporate the  
738 effects of the environment on the dynamics of the phenotype by focusing on  $\mathcal{A}$  and  $\mathcal{Z}$  as Lande  
739 (1982), Barfield et al. (2011) and Childs et al. (2016) have done. In contrast, our approach (which  
740 otherwise has a similar logic to Barfield et al. (2011) and Childs et al. (2016)) tracks the dynamics of  
741  $\mathcal{E}$  and  $\mathcal{A}$  (or  $\mathcal{G}$ —the full genotypic value, including non-additive components—if desired), making  
742 incorporation of environmental drivers that influence inheritance and development of  $[\mathcal{E}]$  more  
743 straightforward. We show that it is possible to have selection operating on the phenotype while  
744 incorporating mechanistic insights into the dynamics of the genetic component of the phenotype  
745 and phenomenological insight into the role of the ecological environment on the dynamics of the  
746 environmental component of the phenotype. By doing this, we show how population responses to  
747 environmental change via adaptive evolution, phenotypic plasticity and epigenetic inheritance can  
748 be simultaneously explored. This opens up the way to provide novel insights into the circumstances  
749 when each process is expected to contribute to population responses to environmental change.

## 750 **Population responses to environmental change**

751 Unlike previous evolutionarily explicit IPMs (Barfield et al., 2011; Childs et al., 2016; Rees and  
752 Ellner, 2016), our approach requires explicit consideration of the inheritance and development of  
753  $\mathcal{E}$ , the environmental component of the phenotype. This allows our models to capture a range of  
754 plastic responses to environmental change along with adaptive ones. What do our findings say  
755 about the contributions of plasticity, evolution, and their interaction to population responses to  
756 environmental change?

757 Detrimental environmental change often causes a decline in population size. When there is an  
758 association between a phenotypic trait and survival and recruitment rates, phenotypic change can  
759 lead to increased survival and recruitment rates (Ozgul et al., 2010) and consequently an increase  
760 in population growth rate and size. Two processes can lead to phenotypic change – plasticity

761 and adaptive evolution. There has been considerable discussion about the relative roles of each in  
762 allowing populations to respond to change (e.g. Bonduriansky et al., 2012; Chevin et al., 2010).

763 Genotypes and breeding values remain fixed within individuals throughout life which means  
764 that differential survival and recruitment rates are the processes that alter these distributions and  
765 underpin evolution. The strength of differential survival and recruitment can be impacted by envi-  
766 ronmental variation generating fluctuating selection (Lande, 2007). Environmental variation does  
767 not influence genetic inheritance: once mating pairs are formed, inheritance of breeding values,  $\mathcal{A}$ ,  
768 does not alter the mean or variance of breeding value distributions (Fisher, 1930). In contrast,  
769 distributions of the environmental component of the phenotype can be altered via survival, re-  
770 cruitment, development and inheritance with each process potentially impacted by environmental  
771 variation (Reed et al., 2010). Given these differences between the dynamics of  $\mathcal{A}$  and  $\mathcal{E}$  plasticity  
772 can lead to more rapid change than evolution in our models (e.g. Figure 4). This is because more  
773 biological processes can directly alter the distribution of plastic characters than can impact dis-  
774 tributions of breeding values. These results are consistent with those of other authors, including  
775 Lande (2009) and Chevin et al. (2010), who also concluded that plastic change should be faster  
776 than evolutionary change. But how quickly will evolution alter phenotypic trait distributions?

777 Our results on the speed of evolution suggest that claims of detectable rapid evolution in  
778 quantitative phenotypes is likely to take a few tens of generations. For example, environmental  
779 change increases mortality leading to a decline in population size, but for mortality selection to lead  
780 to evolutionary change over the course of a generation, a large proportion of the population needs  
781 to be selectively removed and the phenotype needs to be highly heritable. This is seen in our model  
782 results (Figure 4(g)-(i)) and with a simple numerical example: when all individuals above the mean  
783 of a normally distributed character are removed from the population and the trait has a heritable  
784 of  $h^2 = 0.5$ , population size halves in a single time step but the mean of the character will only shift  
785 from the 50<sup>th</sup> percentile to the 37.5<sup>th</sup> percentile. For a standard normal distribution with a mean  
786 of 0 and a standard deviation of unity, this means the mean would only shift by 0.319 – i.e. less  
787 than  $\frac{1}{3}$ <sup>rd</sup> of a standard deviation – i.e. a long way from statistical significance. In reality, mortality

788 selection resulting from environmental change will likely result in a change to the mean of the  
789 distribution that is only a fraction of a standard deviation compared to our example. Given this,  
790 reports of rapid evolution due to environmental change increasing mortality selection over a small  
791 number of generations (e.g. Coltman et al., 2003) should be treated with extreme caution. It is  
792 much more likely that change is a consequence of phenotypic plasticity. Over multiple generations,  
793 recruitment selection can also contribute to evolutionary change and our approach allows the role  
794 of this to be investigated. However, unless reproduction is restricted to individuals with extreme  
795 phenotypic trait values in both sexes, it seems unlikely that evolution can generate statistically  
796 demonstrable evolutionary change over a small number of generations (Coulson et al., in revision).  
797 This is not to say that evolution is not important over longer time scales. Over tens of generations  
798 evolution can shift phenotypic trait means to a greater extent than phenotypic plasticity (Figure  
799 4(g)-(i) blue versus black lines).

800 In order for plasticity to allow populations to rapidly respond to environmental change, a large  
801 proportion of individuals within the population must exhibit the same plastic response. A good  
802 example of such a dynamic is for size-related traits that are determined by resource availability,  
803 particularly when scramble competition is operating. When resources becoming limiting, all indi-  
804 viduals will be unable to develop as rapidly as when resources are more common. A consequence  
805 of this is that individuals that developed in cohorts when resource were sparse will exhibit smaller  
806 body sizes compared to individuals in those cohorts that developed when resources were more  
807 abundant. We can capture this form of plasticity in our framework with an additive effect of den-  
808 sity in the inheritance or development function for  $\mathcal{E}$  (e.g. Figure 3). In contrast, when contest  
809 competition operates, larger individuals would acquire more resources than those that are smaller,  
810 and would develop faster. We can capture this in our models with interactions between density,  $\mathcal{E}$   
811 and  $\mathcal{A}$  in either the inheritance or development functions for  $\mathcal{E}$ .

812 The above discussion demonstrates how our approach can be used to capture different forms of  
813 plasticity. However, for plasticity to help populations respond to environmental change it must be  
814 adaptive: plasticity must change the mean trait value in a way that increases fitness (Ghalambor

815 et al., 2007). We demonstrate that for additive, linear models, adaptive and non-adaptive plasticity  
816 can be specified by altering the sign for the effect of the environment in the function specifying  
817 the mean dynamics of the inheritance or development functions (Figure 3). When interactions are  
818 included in these functions specifying general rules for whether plasticity is adaptive or non-adaptive  
819 will likely be more challenging. However, our approach provides a way in which to investigate when  
820 plasticity is adaptive or non-adaptive, and how different types of plasticity will influence population  
821 responses to environmental change.

822 Our results also show how plasticity can influence evolutionary rates. Plasticity, operating via  
823 development and inheritance functions for the environmental component of the phenotype, alters  
824 the distribution of the phenotype, and this can alter the strength of selection, which can then  
825 influence the dynamics of the genetic component of the phenotype (evolution). The effects of plas-  
826 ticity on selection and evolution can be surprisingly complex. We only examined the evolutionary  
827 consequences of plasticity following an environmental shock that influenced all individuals in the  
828 same way, but even in this simple case we found that adaptive plasticity initially slowed the rate  
829 of evolution compared to non-adaptive plasticity, before increasing it (Figure 5 and SI). In general  
830 in order to understand how plasticity will influence selection, it is necessary to understand how it  
831 influences both the numerator and denominator of the selection differential that underpins evolu-  
832 tion (Pelletier and Coulson, 2012). The numerator is the covariance between the phenotype and  
833 absolute fitness (Falconer, 1960) and the denominator is mean fitness. In our models of species with  
834 non-overlapping generations this is mean recruitment – the population growth rate (Fisher, 1930).  
835 Selection is linear in our models where plasticity influences all individuals in the same way via an  
836 additive effect of density on inheritance of the environmental component of the phenotype (figure  
837 5), and this means that plasticity influences the population growth rate rather than the numerator  
838 of the selection differential. A consequence of this is that it is differences in the population growth  
839 rate that generates the differences in evolutionary rates between models when plasticity is adaptive  
840 and non-adaptive. In more complex cases when plasticity influences the covariance between the  
841 phenotype and fitness via genotype-phenotype interactions within a generation, to understand how

842 selection influences evolution it is necessary to understand how plasticity not only influences mean  
843 fitness, but also how it generates differences between the covariance between the genetic component  
844 of the phenotype and fitness and the covariance between the phenotype itself and fitness. Because  
845 the components of the selection differential can be calculated from IPMs (Coulson et al., 2010;  
846 Wallace et al., 2013) the approach we develop here provides a flexible way to examine how different  
847 types of plasticity can influence evolution following environmental change. But in order to explore  
848 such dynamics in real systems it will be necessary to parameterize our models for real systems.

### 849 **Parameterizing and analyzing evolutionarily explicit IPMs**

850 A large literature exists on how to statistically parameterize IPMs (Easterling et al., 2000; Merow  
851 et al., 2014; Rees et al., 2014). The vast majority of IPMs have been constructed phenomenologi-  
852 cally, using statistical descriptions of observational data. Several authors have shown how fixed and  
853 random effects incorporated into these statistical functions can be formulated within IPMs (Childs  
854 et al., 2003; Coulson, 2012; Rees and Ellner, 2009), but additional statistical estimation is required  
855 to parameterize the evolutionarily explicit IPMs we have developed.

856 Fitness functions in evolutionarily explicit IPMs can be parameterized using standard general,  
857 generalized and additive regression methods that are routinely used to parameterize phenomeno-  
858 logical IPMs (Rees and Ellner, 2009). If relatedness information is available and the infinitesimal  
859 model is assumed, genetic and phenotypic variances and covariances can be estimated using the  
860 animal model (Lynch and Walsh, 1998). These quantities can be used to construct the initial dis-  
861 tributions of the genetic and environmental components of the phenotype. Parameter estimates of  
862 ecological drivers fitted as fixed or random effects in the animal model can be used to parameterize  
863 inheritance and development functions for the environmental component of the phenotype. It is  
864 consequently possible to parameterize models using our approach with existing methods.

865 There is also a large literature on how to analyze IPMs (Ellner and Rees, 2006; Steiner et al.,  
866 2014, 2012). The majority of these tools, including sensitivity and elasticity analysis of model  
867 predictions to transition rates and function parameters (Coulson et al., 2011, 2010; Ellner and Rees,

2006; Steiner et al., 2014, 2012), are likely sufficiently general to be applicable to evolutionarily explicit IPMs. In future work we plan to parameterize models for bird, mammal and fish species with overlapping generations and to analyze them with existing methods. Once evolutionarily explicit IPMs have been parameterized and analyzed we will be able to explore how populations, phenotypic characters and life histories are predicted to respond to a range of environmental changes via plasticity and adaptation.

### **When should evolutionarily explicit IPMs be used to predict population responses to environmental change?**

Chevin (2015) and Janeiro et al. (in press) speculated that published IPMs that did not include explicit evolutionary processes could provide spurious insight. Three strands of evidence suggest this speculation may often be unwarranted.

First, the signature of evolutionary change in model predictions is a function of the heritability of the trait: when the phenotypic variance is dominated by the environmental component of the phenotype then the dynamics of that component will dominate model predictions. Most IPMs to date have been constructed for body weight (Merow et al., 2014), a trait that often has a heritability of less than 0.2 in vertebrates (e.g., blue tits; Garnett, 1981) and often around 0.1 (e.g., bighorn sheep; Wilson et al., 2005). This means that model predictions will be dominated by the dynamics of the environmental component of the phenotype and that a phenomenological statistical approach to parameterising these models has the potential to capture observed dynamics well.

Second, even when phenotypic traits are heritable, they rarely evolve in the wild as predicted: evolutionary stasis of heritable phenotypic traits in the presence of directional selection is frequently observed in nature (Merilä et al., 2001). When fitness functions are monotonic in the phenotypic value and selection is directional (which is typical for body size (Kingsolver et al., 2001)), then in order to maintain an equilibrium trait distribution the inheritance function must reverse the phenotypic changes caused by selection. Coulson and Tuljapurkar (2008) showed this for the mean phenotypic trait; equation (17) demonstrates that this must apply to all moments of the phenotype

894 distribution. However, when the genotype-phenotype map is additive and there is additive genetic  
895 variance for the trait, directional selection is expected to result in evolutionary change and the  
896 inheritance function for the genetic component of the phenotype can not reverse genetic changes  
897 attributable to selection. Unmeasured genetically correlated characters can prevent evolutionary  
898 change in these circumstances, although the cases when this is likely to prevent evolution are restric-  
899 tive, and evidence for such characters playing a major role in limiting evolution in the wild is lacking  
900 (Agrawal and Stinchcombe, 2009). Assuming selection on the phenotype has been measured ap-  
901 propriately and is directional, this suggests that the assumption of an additive genotype-phenotype  
902 map may be violated, and the mean of the parental and offspring breeding value distributions may  
903 not be equal. A mechanism such as over-dominance can achieve this (Fisher, 1930). Our approach  
904 allows the effects of relaxing assumptions of quantitative genetics on evolutionary change to be ap-  
905 proximated through the use of phenomenological inheritance functions for the genetic component  
906 of the phenotype.

907 Third, because evolutionary change is rarely observed in the wild when it is predicted, observed  
908 phenotype change in natural populations is usually attributable to plasticity (e.g. Ozgul et al.,  
909 2010, 2009). In these cases, standard, non-evolutionarily explicit, IPMs have accurately captured  
910 observed dynamics (Childs et al., 2003; Merow et al., 2014; Ozgul et al., 2010).

911 These three strands of evidence suggest that evolutionarily explicit IPMs may frequently not  
912 be required to gain useful insight into population responses to environmental change. If there is no  
913 statistical evidence of temporal trends in inheritance, development or fitness function parameters  
914 once variation in the ecological environment has been corrected for, then the use of evolutionarily  
915 explicit IPMs may result in the construction of unnecessarily complex models. There is often a  
916 temptation to include ever more complexity into models, but this comes at the cost of analyt-  
917 ical tractability: as more mechanisms or processes are incorporated into models, understanding  
918 why a model produces the predictions it does becomes increasingly challenging. However, when  
919 evolutionary change is convincingly documented (e.g. Reznick et al., 1997) or is proposed to be a  
920 possible mechanism generating rapid phenotypic change (Coltman et al., 2003), the construction of

921 evolutionarily explicit IPMs is advised as the models allow separation of the roles of adaptive and  
922 plastic responses to environmental change.

923 We have shown how evolutionarily explicit IPMs can be constructed, invalidating the criticisms  
924 of Chevin (2015) and Janeiro et al. (in press) that IPMs have not been developed to incorporate the  
925 character-state approach of quantitative genetics. IPMs that are not evolutionarily explicit have  
926 been used to address many questions in ecology and their application has proven insightful (Merow  
927 et al., 2014). They are likely to remain widely used and we expect this use to result in important  
928 new insights. However, we have extended their utility to cases where evolutionary processes are  
929 known, or proposed, to be drivers of phenotypic change.

## 930 **Conclusions**

931 In this paper we have developed a theoretical modeling approach that links demography and quan-  
932 titative genetics to explore how populations will respond to environmental change. The approach  
933 is general, providing formal links between ecology and evolution. Our work builds upon a growing  
934 literature of developing evolutionarily explicit structured population models. This body of litera-  
935 ture shows how flexible IPMs are. They provide a powerful tool with the potential to unify ecology  
936 and evolution.

## 937 **Acknowledgements**

938 Bernt-Erik Saether, Luis-Miguel Chevin and Michael Morrissey participated in useful discussion  
939 and provided comments on an earlier version of the manuscript. Stephen Proulx, Thomas Reed,  
940 and two anonymous reviewers provided critical feedback that greatly improved the first submitted  
941 version of the paper. TC greatly acknowledges the support of Centre for Advanced Study in Oslo,  
942 Norway, that funded and hosted our research project (Climate effects on harvested large mammal  
943 populations) during the Academic year of 2015/16.



## 944 **References**

- 945 Agrawal, A. F., and J. R. Stinchcombe. 2009. How much do genetic covariances alter the rate of  
946 adaptation? *Proceedings of the Royal Society of London B* 276:1183–1191.
- 947 Aubin-Horth, N., and S. C. Renn. 2009. Genomic reaction norms: using integrative biology to  
948 understand molecular mechanisms of phenotypic plasticity. *Molecular Ecology* 18:3763–3780.
- 949 Badyaev, A., and T. Martin. 2000. Individual variation in growth trajectories: phenotypic and ge-  
950 netic correlations in ontogeny of the house finch (*carpodacus mexicanus*). *Journal of Evolutionary*  
951 *Biology* 13:290–301.
- 952 Baldwin, J. M. 1896. A new factor in evolution. *The American Naturalist* 30:441–451.
- 953 Barfield, M., R. D. Holt, and R. Gomulkiewicz. 2011. Evolution in stage-structured populations.  
954 *The American Naturalist* 177:397–409.
- 955 Blake, G. E., and E. D. Watson. 2016. Unravelling the complex mechanisms of transgenerational  
956 epigenetic inheritance. *Current Opinion in Chemical Biology* 33:101–107.
- 957 Bonduriansky, R., A. J. Crean, and T. Day. 2012. The implications of nongenetic inheritance for  
958 evolution in changing environments. *Evolutionary Applications* 5:192–201.
- 959 Bossdorf, O., C. L. Richards, and M. Pigliucci. 2008. Epigenetics for ecologists. *Ecology Letters*  
960 11:106–115.
- 961 Caswell, H. 2001. *Matrix Population Models*. Wiley Online Library.
- 962 Charlesworth, B. 1994. *Evolution in Age-structured Populations*. Cambridge University Press  
963 Cambridge.
- 964 Cheverud, J. M., J. Rutledge, and W. R. Atchley. 1983. Quantitative genetics of development:  
965 genetic correlations among age-specific trait values and the evolution of ontogeny. *Evolution*  
966 pages 895–905.

- 967 Chevin, L.-M. 2015. Evolution of adult size depends on genetic variance in growth trajectories:  
968 a comment on analyses of evolutionary dynamics using integral projection models. *Methods in*  
969 *Ecology and Evolution* 6:981–986.
- 970 Chevin, L.-M., R. Lande, and G. M. Mace. 2010. Adaptation, plasticity, and extinction in a  
971 changing environment: towards a predictive theory. *PLoS Biology* 8:e1000357.
- 972 Childs, D. Z., C. Metcalf, and M. Rees. 2010. Evolutionary bet-hedging in the real world: empirical  
973 evidence and challenges revealed by plants. *Proceedings of the Royal Society of London B:*  
974 *Biological Sciences* page rspb20100707.
- 975 Childs, D. Z., M. Rees, K. E. Rose, P. J. Grubb, and S. P. Ellner. 2003. Evolution of complex  
976 flowering strategies: an age- and size-structured integral projection model. *Proceedings of the*  
977 *Royal Society of London B* 270:1829–1838.
- 978 Childs, D. Z., B. C. Sheldon, and M. Rees. 2016. The evolution of labile traits in sex- and age-  
979 structured populations. *Journal of Animal Ecology* 85:329–342.
- 980 Coltman, D. W., P. O’Donoghue, J. T. Jorgenson, J. T. Hogg, C. Strobeck, and M. Festa-Bianchet.  
981 2003. Undesirable evolutionary consequences of trophy hunting. *Nature* 426:655–658.
- 982 Cooch, E., R. F. Rockwell, and S. Brault. 2001. Retrospective analysis of demographic responses  
983 to environmental change: a lesser snow goose example. *Ecological Monographs* 71:377–400.
- 984 Coulson, T. 2012. Integral projections models, their construction and use in posing hypotheses in  
985 ecology. *Oikos* 121:1337–1350.
- 986 Coulson, T., E. A. Catchpole, S. D. Albon, B. J. Morgan, J. Pemberton, T. H. Clutton-Brock,  
987 M. Crawley, and B. Grenfell. 2001. Age, sex, density, winter weather, and population crashes in  
988 soay sheep. *Science* 292:1528–1531.
- 989 Coulson, T., D. R. MacNulty, D. R. Stahler, R. K. Wayne, D. W. Smith, et al. 2011. Modeling

- 990 effects of environmental change on wolf population dynamics, trait evolution, and life history.  
991 *Science* 334:1275–1278.
- 992 Coulson, T., and S. Tuljapurkar. 2008. The dynamics of a quantitative trait in an age-structured  
993 population living in a variable environment. *The American Naturalist* 172:599–612.
- 994 Coulson, T., S. Tuljapurkar, and D. Z. Childs. 2010. Using evolutionary demography to link life  
995 history theory, quantitative genetics and population ecology. *Journal of Animal Ecology* 79:1226–  
996 1240.
- 997 Coulson, T. N., S. Schindler, L. Traill, and B. E. Kendall. in revision. Predicting the evolutionary  
998 consequences of trophy hunting on a quantitative trait. *Journal of Wildlife Management* .
- 999 Crawley, M. J. 2007. *The R Book*. 1st ed. Wiley Publishing.
- 1000 Dawson, T. P., S. T. Jackson, J. I. House, I. C. Prentice, and G. M. Mace. 2011. Beyond predictions:  
1001 biodiversity conservation in a changing climate. *Science* 332:53–58.
- 1002 Diaconis, P., D. Ylvisaker, et al. 1979. Conjugate priors for exponential families. *The Annals of*  
1003 *Statistics* 7:269–281.
- 1004 Doebeli, M. 1997. Genetic variation and persistence of predator-prey interactions in the Nicholson–  
1005 Bailey model. *Journal of Theoretical Biology* 188:109–120.
- 1006 Easterling, M. R., S. P. Ellner, and P. M. Dixon. 2000. Size-specific sensitivity: applying a new  
1007 structured population model. *Ecology* 81:694–708.
- 1008 Ellner, S. P., and M. Rees. 2006. Integral projection models for species with complex demography.  
1009 *The American Naturalist* 167:410–428.
- 1010 Falconer, D. S. 1960. *Introduction to Quantitative Genetics*. Ronald Press co. NY.
- 1011 Feldman, M. W., and L. L. Cavalli-Sforza. 1979. Aspects of variance and covariance analysis with  
1012 cultural inheritance. *Theoretical Population Biology* 15:276–307.

- 1013 Felsenstein, J. 1981. Continuous-genotype models and assortative mating. *Theoretical Population*  
1014 *Biology* 19:341–357.
- 1015 Festa-Bianchet, M., J.-M. Gaillard, and J. T. Jorgenson. 1998. Mass-and density-dependent repro-  
1016 ductive success and reproductive costs in a capital breeder. *The American Naturalist* 152:367–379.
- 1017 Fisher, R. A. 1930. *The genetical theory of natural selection*. Oxford University Press.
- 1018 Garnett, M. 1981. Body size, its heritability and influence on juvenile survival among great tits,  
1019 *parus major*. *Ibis* 123:31–41.
- 1020 Gavrillets, S., and S. M. Scheiner. 1993. The genetics of phenotypic plasticity. V. evolution of  
1021 reaction norm shape. *Journal of Evolutionary Biology* 6:31–48.
- 1022 Ghalambor, C. K., K. L. Hoke, E. W. Ruell, E. K. Fischer, D. N. Reznick, and K. A. Hughes.  
1023 2015. Non-adaptive plasticity potentiates rapid adaptive evolution of gene expression in nature.  
1024 *Nature* 525:372–375.
- 1025 Ghalambor, C. K., J. K. McKay, S. P. Carroll, and D. N. Reznick. 2007. Adaptive versus non-  
1026 adaptive phenotypic plasticity and the potential for contemporary adaptation in new environ-  
1027 ments. *Functional Ecology* 21:394–407.
- 1028 Gilbert, S. F., and D. Epel. 2009. *Ecological developmental biology: integrating epigenetics,*  
1029 *medicine, and evolution*. Sinauer Associates.
- 1030 Hartl, D. L., A. G. Clark, and A. G. Clark. 1997. *Principles of population genetics*, vol. 116. Sinauer  
1031 associates Sunderland.
- 1032 Hoffmann, A. A., and C. M. Sgrò. 2011. Climate change and evolutionary adaptation. *Nature*  
1033 470:479–485.
- 1034 Ives, A. R. 1995. Predicting the response of populations to environmental change. *Ecology* 73:926–  
1035 941.

- 1036 Janeiro, M. J., M. Festa-Bianchet, F. Pelletier, D. W. Coltman, and M. B. Morrissey. in press.  
1037 Towards robust evolutionary inference with integral projection models. *Journal of Evolutionary*  
1038 *Biology* .
- 1039 Kendall, B. E. 2015. A statistical symphony: Instrumental variables reveal causality and control  
1040 measurement error. Pages 149–167 *in* G. A. Fox, S. Negrete-Yankelevich, and V. J. Sosa, eds.  
1041 *Ecological Statistics: Contemporary Theory and Application*. Oxford University Press, Oxford,  
1042 UK.
- 1043 Kingsolver, J. G., H. E. Hoekstra, J. M. Hoekstra, D. Berrigan, S. N. Vignieri, C. Hill, A. Hoang,  
1044 P. Gibert, and P. Beerli. 2001. The strength of phenotypic selection in natural populations. *The*  
1045 *American Naturalist* 157:245–261.
- 1046 Kruuk, L. E., J. Slate, and A. J. Wilson. 2008. New answers for old questions: the evolutionary  
1047 quantitative genetics of wild animal populations. *Annual Review of Ecology, Evolution, and*  
1048 *Systematics* 39:525–548.
- 1049 Lande, R. 1979. Quantitative genetic analysis of multivariate evolution, applied to brain: body size  
1050 allometry. *Evolution* 33:402–416.
- 1051 ———. 1982. A quantitative genetic theory of life history evolution. *Ecology* 63:607–615.
- 1052 ———. 2007. Expected relative fitness and the adaptive topography of fluctuating selection. *Evo-*  
1053 *lution* 61:1835–1846.
- 1054 ———. 2009. Adaptation to an extraordinary environment by evolution of phenotypic plasticity  
1055 and genetic assimilation. *Journal of Evolutionary Biology* 22:1435–1446.
- 1056 Lande, R., and S. J. Arnold. 1983. The measurement of selection on correlated characters. *Evolution*  
1057 pages 1210–1226.
- 1058 Lavergne, S., N. Mouquet, W. Thuiller, and O. Ronce. 2010. Biodiversity and climate change:

- 1059 integrating evolutionary and ecological responses of species and communities. *Annual Review of*  
1060 *Ecology, Evolution and Systematics* 41:321–350.
- 1061 Link, W. A., E. G. Cooch, and E. Cam. 2002. Model-based estimation of individual fitness. *Journal*  
1062 *of Applied Statistics* 29:207–224.
- 1063 Love, O. P., E. H. Chin, K. E. Wynne-Edwards, and T. D. Williams. 2005. Stress hormones: a link  
1064 between maternal condition and sex-biased reproductive investment. *The American Naturalist*  
1065 166:751–766.
- 1066 Lynch, M., and B. Walsh. 1998. *Genetics and Analysis of Quantitative Traits*, vol. 1. Sinauer  
1067 Sunderland, MA.
- 1068 Merilä, J., L. Kruuk, and B. Sheldon. 2001. Cryptic evolution in a wild bird population. *Nature*  
1069 412:76–79.
- 1070 Merow, C., J. P. Dahlgren, C. J. E. Metcalf, D. Z. Childs, M. E. Evans, E. Jongejans, S. Record,  
1071 M. Rees, R. Salguero-Gómez, and S. M. McMahon. 2014. Advancing population ecology with  
1072 integral projection models: a practical guide. *Methods in Ecology and Evolution* 5:99–110.
- 1073 Metz, J. A., S. A. Geritz, G. Meszéna, F. J. Jacobs, J. S. Van Heerwaarden, et al. 1996. Adaptive  
1074 dynamics, a geometrical study of the consequences of nearly faithful reproduction. *Stochastic*  
1075 *and Spatial Structures of Dynamical Systems* 45:183–231.
- 1076 Monaghan, P. 2008. Early growth conditions, phenotypic development and environmental change.  
1077 *Philosophical Transactions of the Royal Society of London B* 363:1635–1645.
- 1078 Nussey, D., A. Wilson, and J. Brommer. 2007. The evolutionary ecology of individual phenotypic  
1079 plasticity in wild populations. *Journal of Evolutionary Biology* 20:831–844.
- 1080 Ozgul, A., D. Z. Childs, M. K. Oli, K. B. Armitage, D. T. Blumstein, L. E. Olson, S. Tuljapurkar,  
1081 and T. Coulson. 2010. Coupled dynamics of body mass and population growth in response to  
1082 environmental change. *Nature* 466:482–485.

- 1083 Ozgul, A., S. Tuljapurkar, T. G. Benton, J. M. Pemberton, T. H. Clutton-Brock, and T. Coulson.  
1084 2009. The dynamics of phenotypic change and the shrinking sheep of st. kilda. *Science* 325:464–  
1085 467.
- 1086 Pelletier, F., and T. Coulson. 2012. A new metric to calculate the opportunity for selection on  
1087 quantitative characters. *Evolutionary Ecology Research* 14:729–742.
- 1088 Reed, T. E., R. S. Waples, D. E. Schindler, J. J. Hard, and M. T. Kinnison. 2010. Phenotypic  
1089 plasticity and population viability: the importance of environmental predictability. *Proceedings*  
1090 *of the Royal Society of London B* 277:3391–3400.
- 1091 Rees, M., D. Z. Childs, and S. P. Ellner. 2014. Building integral projection models: a user’s guide.  
1092 *Journal of Animal Ecology* 83:528–545.
- 1093 Rees, M., and S. P. Ellner. 2009. Integral projection models for populations in temporally varying  
1094 environments. *Ecological Monographs* 79:575–594.
- 1095 ———. 2016. Evolving integral projection models: evolutionary demography meets eco-  
1096 evolutionary dynamics. *Methods in Ecology and Evolution* 7:157–170.
- 1097 Reznick, D. N., F. H. Shaw, F. H. Rodd, and R. G. Shaw. 1997. Evaluation of the rate of evolution  
1098 in natural populations of guppies (*Poecilia reticulata*). *Science* 275:1934–1937.
- 1099 Richards, E. J. 2006. Inherited epigenetic variation revisiting soft inheritance. *Nature Reviews*  
1100 *Genetics* 7:395–401.
- 1101 Scheiner, S. M. 1993. Genetics and evolution of phenotypic plasticity. *Annual Review of Ecology*  
1102 *and Systematics* 24:35–68.
- 1103 Schindler, S., J. Gaillard, A. Grüning, P. Neuhaus, L. Traill, S. Tuljapurkar, and T. Coulson. 2015.  
1104 Sex-specific demography and generalization of the Trivers-Willard theory. *Nature* 526:249–252.
- 1105 Schindler, S., P. Neuhaus, J.-M. Gaillard, and T. Coulson. 2013. The influence of nonrandom  
1106 mating on population growth. *The American Naturalist* 182:28–41.

- 1107 Sedinger, J. S., P. L. Flint, and M. S. Lindberg. 1995. Environmental influence on life-history traits:  
1108 growth, survival, and fecundity in black brant (*branta bernicla*). *Ecology* 76:2404–2414.
- 1109 Smallegange, I. M., and T. Coulson. 2013. Towards a general, population-level understanding of  
1110 eco-evolutionary change. *Trends in Ecology & Evolution* 28:143–148.
- 1111 Snell-Rood, E. C., J. D. Van Dyken, T. Cruickshank, M. J. Wade, and A. P. Moczek. 2010. Toward  
1112 a population genetic framework of developmental evolution: the costs, limits, and consequences  
1113 of phenotypic plasticity. *BioEssays* 32:71–81.
- 1114 Söderström, T. D., and P. G. Stoica. 2002. Instrumental variable methods for system identification,  
1115 vol. 21. Springer.
- 1116 Solberg, E. J., A. Loison, J.-M. Gaillard, and M. Heim. 2004. Lasting effects of conditions at birth  
1117 on moose body mass. *Ecography* 27:677–687.
- 1118 Steiner, U. K., S. Tuljapurkar, and T. Coulson. 2014. Generation time, net reproductive rate, and  
1119 growth in stage-age-structured populations. *The American Naturalist* 183:771–783.
- 1120 Steiner, U. K., S. Tuljapurkar, T. Coulson, and C. Horvitz. 2012. Trading stages: life expectancies  
1121 in structured populations. *Experimental Gerontology* 47:773–781.
- 1122 Traill, L. W., S. Schindler, and T. Coulson. 2014*a*. Demography, not inheritance, drives phenotypic  
1123 change in hunted bighorn sheep. *Proceedings of the National Academy of Sciences* 111:13223–  
1124 13228.
- 1125 ———. 2014*b*. Reply to Hedrick et al.: Trophy hunting influences the distribution of trait values  
1126 through demographic impacts. *Proceedings of the National Academy of Sciences* 111:E4811–  
1127 E4811.
- 1128 Turelli, M., and N. Barton. 1994. Genetic and statistical analyses of strong selection on polygenic  
1129 traits: what, me normal? *Genetics* 138:913–941.



- 1130 Vindenes, Y., and Ø. Langangen. 2015. Individual heterogeneity in life histories and eco-  
1131 evolutionary dynamics. *Ecology Letters* 18:417–432.
- 1132 Wallace, K., A. Leslie, and T. Coulson. 2013. Re-evaluating the effect of harvesting regimes on Nile  
1133 crocodiles using an integral projection model. *Journal of Animal Ecology* 82:155–165.
- 1134 Wiens, J. A., D. Stralberg, D. Jongsomjit, C. A. Howell, and M. A. Snyder. 2009. Niches, models,  
1135 and climate change: assessing the assumptions and uncertainties. *Proceedings of the National  
1136 Academy of Sciences* 106:19729–19736.
- 1137 Wilson, A. J., L. E. Kruuk, and D. W. Coltman. 2005. Ontogenetic patterns in heritable variation  
1138 for body size: using random regression models in a wild ungulate population. *The American  
1139 Naturalist* 166:E177–E192.
- 1140 Wilson, A. J., and D. H. Nussey. 2010. What is individual quality? An evolutionary perspective.  
1141 *Trends in Ecology & Evolution* 25:207–214.
- 1142 Yoshida, T., L. E. Jones, S. P. Ellner, G. F. Fussmann, and N. G. Hairston. 2003. Rapid evolution  
1143 drives ecological dynamics in a predator–prey system. *Nature* 424:303–306.

Table 1: Notation used in the paper.

| Notation                         | Definition                                                                                                                                                                                                                                                                                                                         |
|----------------------------------|------------------------------------------------------------------------------------------------------------------------------------------------------------------------------------------------------------------------------------------------------------------------------------------------------------------------------------|
| $\mathcal{Z}$                    | An individual's phenotypic trait value. $\mathcal{Z}$ can be anything that can be measured on an organism when it is captured or observed. $\mathcal{Z}$ cannot be a life history quantity (like life expectancy) which are emergent properties of the dynamics of $\mathcal{Z}$ .                                                 |
| $\mathcal{G}$                    | The genetic component of the phenotype defined as the total genotypic contribution of an individual's genotype to $\mathcal{Z}$ . $\mathcal{G}$ can be calculated across multiple loci and can be decomposed into contributions from epistasis, dominance, and additive genetic effects.                                           |
| $\mathcal{A}$                    | The additive genetic component (breeding value) of $\mathcal{G}$ . Change in the distribution of $\mathcal{A}$ reflects change in allele frequencies and consequently evolution.                                                                                                                                                   |
| $\mathcal{E}$                    | The environmental component of the phenotype defined as phenotypic variation not attributable to genetic contributions. Determined by gene expression patterns or developmental noise. Nutrient or energy availability may influence gene expression meaning $\mathcal{E}$ may be correlated with environmental drivers $\theta$ . |
| $\theta$                         | An environmental driver                                                                                                                                                                                                                                                                                                            |
| $\mathcal{X}$                    | $\mathcal{X} \in \{\mathcal{Z}, \mathcal{G}, \mathcal{A}, \mathcal{E}\}$                                                                                                                                                                                                                                                           |
| $N(\mathcal{X}, t)$              | The distribution of $\mathcal{X}$ at time $t$                                                                                                                                                                                                                                                                                      |
| $S(\mathcal{X}, t)$              | Survival function: describes the expected association between $\mathcal{X}$ and survival between $t$ and $t+1$ . Only used in age-structured models.                                                                                                                                                                               |
| $R(\mathcal{X}, t)$              | Recruitment function: describes the expected association between $\mathcal{X}$ and the number of offspring produced between $t$ and $t+1$ that survive to recruit into the population at time $t+1$ .                                                                                                                              |
| $H(\mathcal{X}' \mathcal{X}, t)$ | Inheritance function: describes the expected probability of a reproducing individual with character value $\mathcal{X}$ at $t$ producing an offspring with character value $\mathcal{X}'$ at $t+1$ when it recruits to the population.                                                                                             |

|                                  |                                                                                                                                                                                                                     |
|----------------------------------|---------------------------------------------------------------------------------------------------------------------------------------------------------------------------------------------------------------------|
| $D(\mathcal{X}' \mathcal{X}, t)$ | Development function: describes expected probability of a surviving individual with character value $\mathcal{X}$ at $t$ expressing character value $\mathcal{X}'$ at $t + 1$ . Only used in age-structured models. |
|----------------------------------|---------------------------------------------------------------------------------------------------------------------------------------------------------------------------------------------------------------------|

Table 2: Different forms of plasticity and their incorporation into IPMs. Each term in the table below can be included in the functions  $\mu^H(\mathcal{E}, t)$ ,  $\mu^H(\mathcal{E}, a, t)$  or  $\mu^D(\mathcal{E}, a, t)$ . Similar terms could be included in  $V^H(\mathcal{E}, t)$ ,  $V^H(\mathcal{E}, a, t)$  or  $V^D(\mathcal{E}, a, t)$  if the variance in inheritance or development varied for specific values of  $\mathcal{E}$  in predictable ways. This would capture different forms of bet-hedging.

| Term                                                          | Biological interpretation                                                                                    | Type of plasticity                                                                                 |
|---------------------------------------------------------------|--------------------------------------------------------------------------------------------------------------|----------------------------------------------------------------------------------------------------|
| $\mu_I^H$                                                     |                                                                                                              | No plasticity.                                                                                     |
| $+\mu_{\mathcal{E}, \mathcal{E}'}^H$                          | Temporal autocorrelation in $\mathcal{E}$                                                                    | No plasticity.                                                                                     |
| $+\mu_{\theta}^H$                                             | Ecological environment influences all values of $\mathcal{E}$ in the same way.                               | Additive plasticity generated by temporal variation in the ecological environment.                 |
| $+\mu_{\theta, \mathcal{E}}^H \theta \mathcal{E}$             | Temporal autocorrelation in $\mathcal{E}$ depends upon the ecological environment.                           | Non-additive plasticity generated by temporal and spatial variation in the ecological environment. |
| $+\mu_{\mathcal{A}}^H \mathcal{A}$                            | Value of $\mathcal{E}$ depends upon $\mathcal{E}$ .                                                          | No plasticity unless $\mathcal{E}$ also depends upon $\theta$ .                                    |
| $+\mu_{\theta, \mathcal{A}}^H \theta \mathcal{A}$             | Value of the $\mathcal{E}$ depends upon an interaction between $\mathcal{A}$ and the ecological environment. | Genotype by environment interaction.                                                               |
| $+\mu_{\mathcal{A}, \mathcal{E}'}^H \mathcal{A} \mathcal{E}'$ | Temporal autocorrelation in $\mathcal{E}$ depends upon the $\mathcal{A}$ .                                   | Genotype by environment interaction.                                                               |

1145

## 1146 Figure legends

1147 **Figure 1.** The role of selection on the dynamics of  $\mathcal{A}$ . Dynamics of univariate  $\mathcal{A}$  subject to  
 1148 linear selection and clonal inheritance (a)-(d) (SI §1.1 Model A). The population does not reach

1149 an equilibrium, with (a) population growth, and the (b) mean, (c) variance and (d) skew of the  
1150 character continually evolving. Imposing a maximum possible character value constrains change  
1151 (red lines versus black lines (a)-(d)). In the age-structured case we track the dynamics of a bivariate  
1152 character distribution (e)-(g) (SI §1.1 models B, C and D). The models in (e) and (f) (SI Models  
1153 B and C) are identical except the starting distribution at time  $t = 1$  has a covariance of -0.2 in (f)  
1154 compared to 0.7 in (e). The parameterisation in (g) is chosen to demonstrate a case where the two  
1155 traits evolve in different directions. The coloured image plots in figures (e)-(g) represent Gaussian  
1156 development functions  $D(\mathcal{Z}'|\mathcal{Z}, t)$  fitted to the bivariate distributions of  $\mathcal{A}$  at the beginning and end  
1157 of the simulation. Evolution of the bivariate character has resulted in different parameterisations  
1158 of these phenomenological functions. The lighter the shading, the greater the probability of a  
1159 transition from character value  $\mathcal{Z}$  at age 1 and to  $\mathcal{Z}'$  age 2.

1160 **Figure 2.** The dynamics of inheritance (SI Model E). The dynamics of (a) population growth rate  
1161 ( $R_0$ ), the (b) mean and (c) variance of  $\mathcal{A}$  vary between models with clonal inheritance (black line),  
1162 the convolution in equation (15) (red line) and the Gaussian inheritance function in equation (16)  
1163 (blue line). Dynamics predicted from the convolution and the Gaussian inheritance function are  
1164 indistinguishable in this model. (d) the temporal dynamics of the clonal model versus the other  
1165 models. The initial distribution at  $t = 1$  is Gaussian. After 100 generations the character distribu-  
1166 tions predicted by the clonal and sexual models have only diverged slightly. The infinitesimal model  
1167 of quantitative genetics assumes that the dynamics of alleles can be inferred from the dynamics of  
1168 genotypes. Under this assumption (e) selection alters genotype and allele frequencies, while inheri-  
1169 tance does not. In contrast, (f) when dominance variance operates, both selection and inheritance  
1170 alter genotype frequency while neither alter allele frequencies. For a Gaussian distributed char-  
1171 acter, (g) dominance variance acts as an offset, reducing the intercept of a Gaussian inheritance  
1172 function.

1173 **Figure 3.** Dynamics of  $\mathcal{E}$  and plasticity. (a) Return times to equilibrium for three inheritance  
1174 functions (SI §1.1 models F-H) following a one off perturbation (see main text). There is no  
1175 plasticity incorporated into model F (black line). Model G (red line) and model H (blue line)

1176 respectively incorporate adaptive and non-adaptive phenotypic plasticity. In (b) and (c) we imposed  
1177 a permanent environmental change by reducing the intercept of the fitness function. (c) Represents  
1178 the mean phenotype.

1179 **Figure 4.** A dynamic version of the Breeders Equation. The dynamics of the phenotype (red lines)  
1180 and its genetic (black lines) and environmental (blue lines) components (a)-(c) and (g)-(i), and the  
1181 dynamics of the population (d)-(f) and (j)-(l). In the first model (a) and (d), both fitness and  
1182 inheritance of the environmental component of the phenotype are independent of density (SI §1.1  
1183 model I). In the second model (b) and (e) fitness is negatively density-dependent and inheritance  
1184 of the environmental component of the phenotype is density-independent (SI §1.1 model J). In the  
1185 third model, both fitness and inheritance of the environmental component of the phenotype are  
1186 negative density-dependent (SI §1.1 Model K). The treatment of plasticity can dramatically influ-  
1187 ence the dynamics of the phenotype and population size (SI §1.1 models L-N). Adaptive phenotypic  
1188 plasticity (h) and (k) leads to the population size and phenotype recovering from a perturbation  
1189 much faster than non-adaptive plasticity (i)-(l). The absence of a plastic response (g) and (j) re-  
1190 sults in the population recovering from a perturbation at an intermediate rate between cases where  
1191 adaptive and non-adaptive plasticity are operating.

1192 **Figure 5.** Dynamics of bivariate characters and evolution of fitness functions in the presence of  
1193 an unmeasured, genetically correlated character (SI §1.1 model P and Q). We construct a simple  
1194 model with clonal inheritance of two correlated characters that both influence fitness. We explore  
1195 two initial starting conditions that only differ in their genetic covariance (SI §1.1 models P and Q).  
1196 In (a)-(d) the covariance accelerates the rate of evolution compared to (e)-(h). The dynamics of the  
1197 fitness function for each character when the other character is not measured (i) and (j). Regardless  
1198 of the covariance between characters, the fitness functions evolve during the course of 120 time step  
1199 simulation.

Figure 1

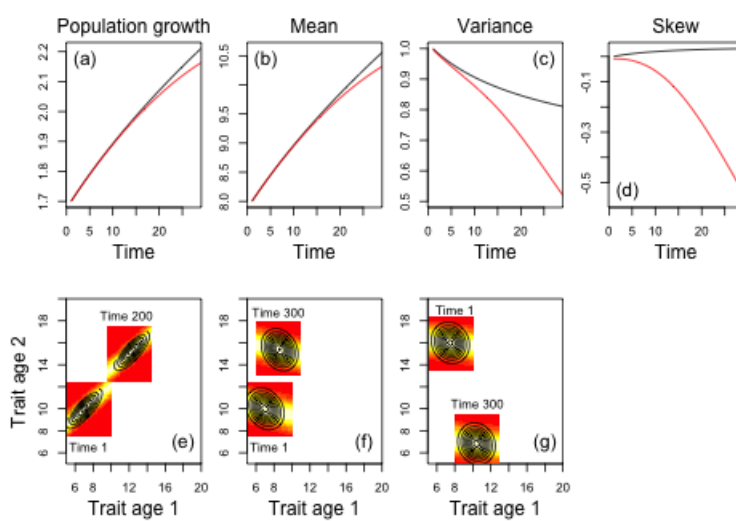

Figure 2

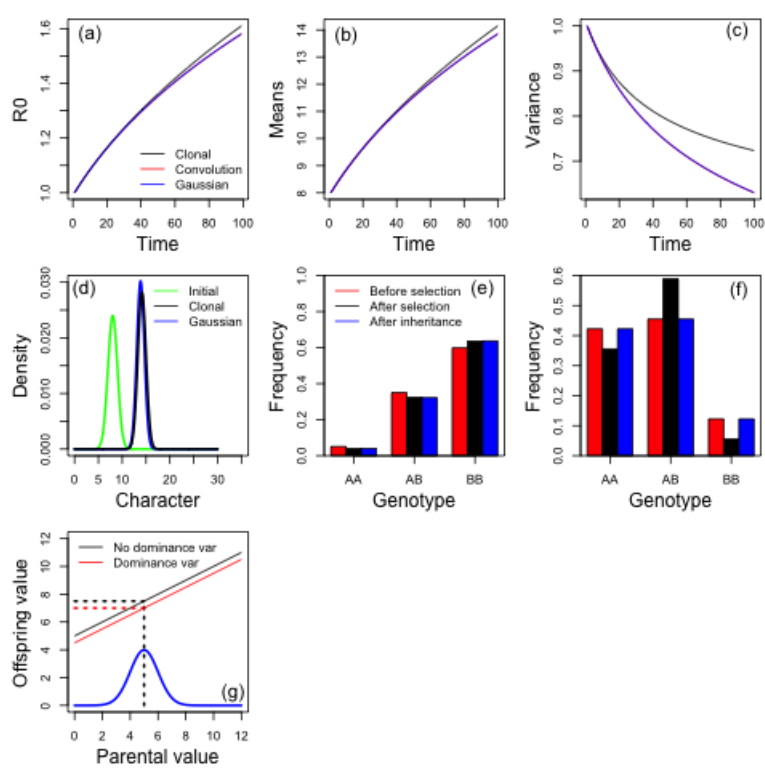



Figure 3

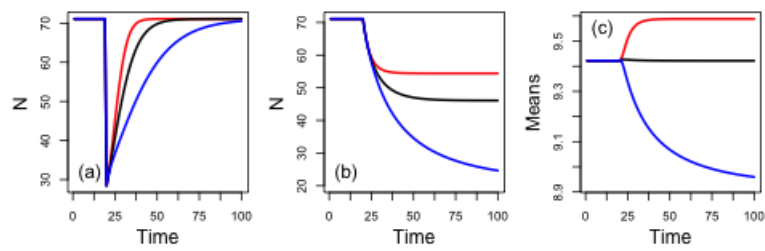

Figure 4

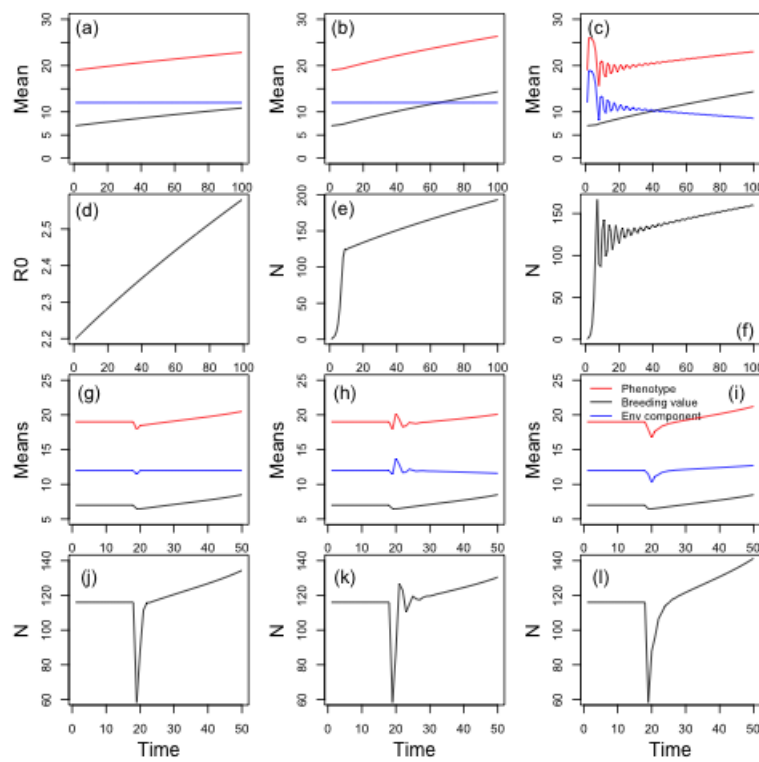

Figure 5

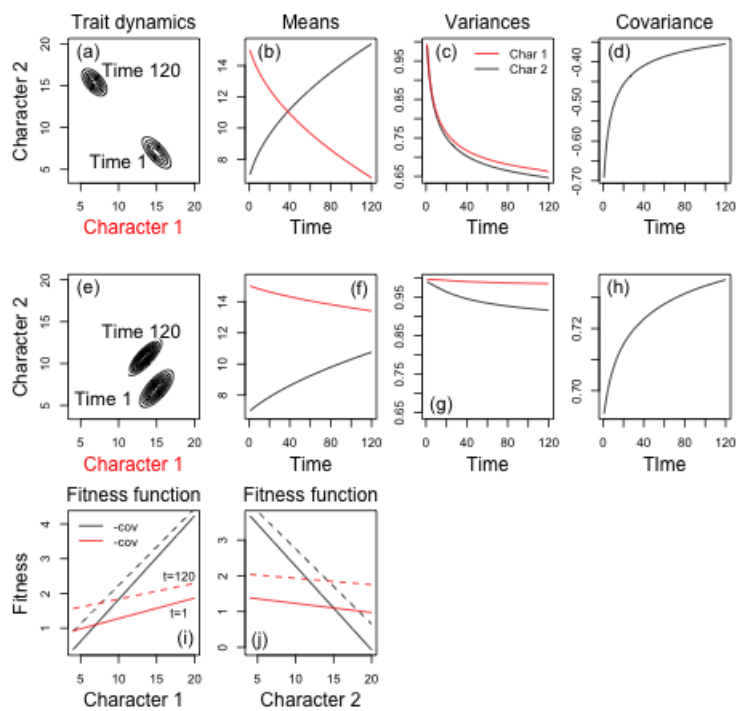

## 1200 Supplementary information

### 1201 1.1 Model Parameterization

#### 1202 Model A:

$$N(\mathcal{A}, t = 1) = \phi(8, 1)$$

$$R(\mathcal{A}, t) = 0.1 + 0.2\mathcal{A}$$

$$\mu_H(\mathcal{A}, t) = \mathcal{A}$$

$$V(\mathcal{A}, t) = 0$$

$$x = \infty \text{ or } x = 11.5$$

#### 1203 Models B and C:

$$S(\mathcal{A}1, 1, t) = \frac{1}{1 + e^{-(0.1+0.03\mathcal{A})}}$$

$$S(\mathcal{A}2, 2, t) = 0$$

$$R(\mathcal{A}1, 1, t) = 0$$

$$R(\mathcal{A}2, 2, t) = e^{0.01-0.075\mathcal{A}}.$$

1204 Starting conditions at time  $t = 1$  are multivariate normal with the following parameters, **Model**

#### 1205 B:

$$\mathbb{E}(\mathcal{A}1) = 7$$

$$\mathbb{E}(\mathcal{A}2) = 10$$

$$\sigma^2(\mathcal{A}1) = 1$$

$$\sigma^2(\mathcal{A}2) = 0.8$$

$$\sigma(\mathcal{A}1, \mathcal{A}2) = -0.2$$

1206 **Model C:**

$$\begin{aligned}\mathbb{E}(\mathcal{A}1) &= 7 \\ \mathbb{E}(\mathcal{A}2) &= 10 \\ \sigma^2(\mathcal{A}1) &= 1 \\ \sigma^2(\mathcal{A}2) &= 0.8 \\ \sigma(\mathcal{A}1, \mathcal{A}2) &= 0.2\end{aligned}$$

1207 **Model D:**

$$\begin{aligned}S(\mathcal{A}, 1, t) &= \frac{1}{1 + e^{-(0.1+0.06\mathcal{A})}} \\ S(\mathcal{A}, 2, t) &= 0 \\ R(\mathcal{A}, 1, t) &= 0 \\ R(\mathcal{A}, 2, t) &= e^{0.01+0.05\mathcal{A}}.\end{aligned}$$

1208 Starting conditions at time  $t = 1$  for **model D:**

$$\begin{aligned}\mathbb{E}(\mathcal{A}1) &= 7.5 \\ \mathbb{E}(\mathcal{A}2) &= 16 \\ \sigma^2(\mathcal{A}1) &= 1 \\ \sigma^2(\mathcal{A}2) &= 0.8 \\ \sigma(\mathcal{A}1, \mathcal{A}2) &= -0.1\end{aligned}$$

**Model E:**

$$R(\mathcal{A}, t) = 0.2 + 0.1\mathcal{A}. \tag{22}$$

1209 **Model F:** no plasticity:

$$\begin{aligned}R(\mathcal{E}, t) &= 0.2 + 0.1\mathcal{E} - 0.002n(t) \\ \mu_H(\mathcal{E}, t) &= 4.64 + 0.5\mathcal{E} \\ V_H(\mathcal{E}, t) &= 1\end{aligned}$$

1210 **Model G:** Adaptive phenotypic plasticity:

$$\begin{aligned}R(\mathcal{E}, t) &= 0.2 + 0.1\mathcal{E} - 0.002n(t) \\ \mu_H(\mathcal{E}, t) &= 5 + 0.5\mathcal{E} - 0.005n(t) \\ V_H(\mathcal{E}, t) &= 1\end{aligned}$$

1211 **Model H:** Non-adaptive plasticity:

$$\begin{aligned}R(\mathcal{E}, t) &= 0.2 + 0.1\mathcal{E} - 0.002n(t) \\ \mu_H(\mathcal{E}, t) &= 4.29 + 0.5\mathcal{E} + 0.005n(t) \\ V_H(\mathcal{E}, t) &= 1\end{aligned}$$

1212 **Model I**

$$\begin{aligned}w(\mathcal{Z}, t) &= 0.3 + 0.1\mathcal{Z} \\ \mu^H(\mathcal{E}, t) &= 0 \\ v^H(\mathcal{E}, t) &= 1\end{aligned}$$

1213 **Model J**

$$\begin{aligned}w(\mathcal{Z}, t) &= 0.3 + 0.1\mathcal{Z} - 0.01n(t) \\ \mu^H(\mathcal{E}, t) &= 0 \\ v^H(\mathcal{E}, t) &= 1\end{aligned}$$

1214 **Model K**

$$\begin{aligned}w(\mathcal{Z}, t) &= 0.3 + 0.1\mathcal{Z} - 0.01n(t) \\ \mu^H(\mathcal{E}, t) &= 19 - 0.065n(t) \\ v^H(\mathcal{E}, t) &= 1\end{aligned}$$

1215 Initial starting conditions for  $\mathcal{Z} = \mathcal{A} + \mathcal{E}$  for **models I to K**:

$$\begin{aligned}\mathbb{E}(\mathcal{A}) &= 7 \\ \mathbb{E}(\mathcal{E}) &= 12 \\ \sigma^2(\mathcal{A}) &= 1 \\ \sigma^2(\mathcal{E}) &= 1 \\ \sigma(\mathcal{A}, \mathcal{E}) &= 0\end{aligned}$$

1216 **Model L**

$$\begin{aligned}w(\mathcal{Z}, t) &= 0.3 + 0.1\mathcal{Z} - 0.01n(t) \\ \mu^H(\mathcal{E}, t) &= 12 \\ v^H(\mathcal{E}, t) &= 1\end{aligned}$$

1217 **Model M**

$$\begin{aligned}w(\mathcal{Z}, t) &= 0.3 + 0.1\mathcal{Z} - 0.01n(t) \\ \mu^H(\mathcal{E}, t) &= 15.48 - 0.03n(t) \\ v^H(\mathcal{E}, t) &= 1\end{aligned}$$

1218 **Model N**

$$\begin{aligned}w(\mathcal{Z}, t) &= 0.3 + 0.1\mathcal{Z} - 0.01n(t) \\ \mu^H(\mathcal{E}, t) &= 8.52 + 0.03n(t) \\ v^H(\mathcal{E}, t) &= 1\end{aligned}$$

1219 Initial starting conditions for  $\mathcal{Z} = \mathcal{A} + \mathcal{E}$  for **models L to N**:

$$\begin{aligned}\mathbb{E}(\mathcal{A}) &= 7 \\ \mathbb{E}(\mathcal{E}) &= 12 \\ \sigma^2(\mathcal{A}) &= 1 \\ \sigma^2(\mathcal{E}) &= 1 \\ \sigma(\mathcal{A}, \mathcal{E}) &= 0\end{aligned}$$

1220 **Models P and Q:**

$$\begin{aligned}w(\mathcal{A}, t) &= 2 - 0.13\mathcal{A}1 + 0.15\mathcal{A}2 \\ N(\mathcal{A}', t + 1) &= w(\mathcal{A}, t)N(\mathcal{A}, t)\end{aligned}$$

1221 Starting conditions at time  $t + 1$  for **model P**:

$$\begin{aligned}\mathbb{E}(\mathcal{A}1) &= 7 \\ \mathbb{E}(\mathcal{A}2) &= 15 \\ \sigma^2(\mathcal{A}1) &= 1 \\ \sigma^2(\mathcal{A}2) &= 1 \\ \sigma(\mathcal{A}1, \mathcal{A}2) &= -0.7\end{aligned}$$

1222 Starting conditions at time  $t + 1$  for **model Q**:

$$\begin{aligned}\mathbb{E}(\mathcal{A}1) &= 7 \\ \mathbb{E}(\mathcal{A}2) &= 15 \\ \sigma^2(\mathcal{A}1) &= 1 \\ \sigma^2(\mathcal{A}2) &= 1 \\ \sigma(\mathcal{A}1, \mathcal{A}2) &= 0.7\end{aligned}$$



## 1223 1.2 Calculating quantities from model outputs

The expectation of a distribution of  $\mathcal{X} = (\mathcal{G}, \mathcal{A}, \mathcal{E}, \mathcal{Z})$  can be calculated as

$$\mathbb{E}(\mathcal{X}, t) = \frac{\int \mathcal{X} N(\mathcal{X}, t) d\mathcal{X}}{\int N(\mathcal{X}, t) d\mathcal{X}}, \quad (23)$$

The variance of a distribution can be calculated as

$$\sigma^2(\mathcal{X}, t) = \frac{\int \mathcal{X} \mathcal{X} N(\mathcal{X}, t) d\mathcal{X}}{\int N(\mathcal{X}, t) d\mathcal{X}} - \mathbb{E}(\mathcal{X}, t)^2. \quad (24)$$

For a bivariate distribution  $\mathcal{X}$  consisting of traits  $\mathcal{X}1$  and  $\mathcal{X}2$  then the covariance between these two traits will be,

$$\sigma(\mathcal{X}1, \mathcal{X}2, t) = \frac{\int \mathcal{X}1 \mathcal{X}2 N(\mathcal{X}, t) d\mathcal{X}}{\int N(\mathcal{X}, t) d\mathcal{X}} - \mathbb{E}(\mathcal{X}1, t) \mathbb{E}(\mathcal{X}2, t). \quad (25)$$

The skew can be calculated as,

$$s^3(\mathcal{X}) = \frac{\int \mathcal{X}^3 N(\mathcal{X}, t) d\mathcal{X}}{\int N(\mathcal{X}, t) d\mathcal{X}} - 3\mathbb{E}(\mathcal{X}, t) \sigma^2(\mathcal{X}, t) - \frac{\mathbb{E}(\mathcal{X}, t)^3}{\sqrt{\sigma^2(\mathcal{X}, t)^3}}$$

1224 The kurtosis can be calculated in the following way. First, we define the  $n^{\text{th}}$  non-central moment  
1225 of a distribution at time  $t$  as  $m^n(\mathcal{X}, t) = \frac{\int \mathcal{X}^n N(\mathcal{X}, t) d\mathcal{X}}{\int N(\mathcal{X}, t) d\mathcal{X}}$ , then,

$$k^4(\mathcal{X}) = \frac{\frac{\int \mathcal{X}^4 N(\mathcal{X}, t) d\mathcal{X}}{\int N(\mathcal{X}, t) d\mathcal{X}} - 4\mathbb{E}(\mathcal{X}, t) m^3(\mathcal{X}, t) + 6\mathbb{E}(\mathcal{X}, t)^2 m^2(\mathcal{X}) - 3\mathbb{E}(\mathcal{X}, t)^4}{\sigma^2(\mathcal{X}, t)} - 3$$

## 1226 1.3 Gaussian inheritance function when demography differs between males and 1227 females

1228 The distribution of mothers and fathers at time  $t$  is respectively defined as  $N_R^f(\mathcal{A}, t)$  and  $N_R^m(\mathcal{A}, t)$ .

1229 These distributions are the same size.

We can write

$$N(\mathcal{A}, t + 1) = \int H(\mathcal{A}' | \mathcal{A}_m, \mathcal{A}_f, t) N_R^m(\mathcal{A}, t) d\mathcal{A} \quad (26)$$

1230 where the component functions of  $H(\mathcal{A}' | \mathcal{A}_m, \mathcal{A}_f, t)$  are

$$\begin{aligned} \mu^H(\mathcal{A}, t) &= (1 - \eta) \mathbb{E}(N_R^f(\mathcal{A}, t)) + \eta \mathcal{A} \\ V^H(\mathcal{A}, t) &= (1 - \eta)^2 \sigma^2(N_R(\mathcal{A}, t)) \end{aligned} \quad (27)$$

1231 and  $\sigma^2(N_R(\mathcal{A}, t))$  is the variance in  $\mathcal{A}$  across all parents.

Alternatively,

$$N(\mathcal{A}, t + 1) = \int H(\mathcal{A}'|\mathcal{A}_m, \mathcal{A}_f, t) N_R^f(\mathcal{A}, t) d\mathcal{A} \quad (28)$$

1232 where the component functions of  $H(\mathcal{A}'|\mathcal{A}_m, \mathcal{A}_f, t)$  are

$$\begin{aligned} \mu^H(\mathcal{A}, t) &= (1 - \eta)\mathbb{E}(N_R^m(\mathcal{A}, t)) + \eta\mathcal{A} \\ V^H(\mathcal{A}, t) &= (1 - \eta)^2\sigma^2(N_R(\mathcal{A}, t)). \end{aligned} \quad (29)$$

1233 As the distributions  $N_R^f(\mathcal{A}, t)$  and  $N_R^m(\mathcal{A}, t)$  depart from normality, the approximations will  
1234 predict dynamics that diverge from those predicted by the convolution.

#### 1235 1.4 How do different functions alter character distributions?

1236 Assume  $N(\mathcal{X}, t)$  is proportional to a Gaussian distribution. The following parameterizations of a  
1237 transition functions  $H(\mathcal{X}'|\mathcal{X}, t)$  in a model  $N(\mathcal{X}', t + 1) = \int H(\mathcal{X}'|\mathcal{X}, t)N(\mathcal{X}, t)$  will have no effect  
1238 on the location or shape of the distribution such that  $N(\mathcal{X}, t) = N(\mathcal{X}', t + 1)$ ,

$$\begin{aligned} \mu^H(\mathcal{X}, t) &= (1 - \beta)\mathbb{E}(\mathcal{X}, t) + \beta\mathcal{X} \\ V^H(\mathcal{X}, t) &= (1 - \beta^2)\sigma^2(\mathcal{X}, t). \end{aligned} \quad (30)$$

1239 Note that in this model there is no fitness function and no selection.

1240 When the intercept of  $\mu^H(\mathcal{X}, t)$  is less than  $(1 - \beta)\mathbb{E}(\mathcal{X}, t)$  then  $\mathbb{E}(\mathcal{X}', t + 1) < \mathbb{E}(\mathcal{X}', t)$  and vice  
1241 versa. A function  $\mu^H(\mathcal{X}, t)$  can consequently be parameterized to reduce the mean of a distribution  
1242 across generations or time steps if desired.

1243 The slope  $\beta$  will reduce  $\sigma^2(\mathcal{X}', t + 1)$  by  $\beta^2$  compared to  $\sigma^2(\mathcal{X}, t)$ . The intercept of  $V^H(\mathcal{X}, t)$   
1244 injects additional variation. If the intercept is larger than  $(1 - \beta^2)\sigma^2(\mathcal{X}, t)$  then  $\sigma^2(\mathcal{X}', t + 1) >$   
1245  $\sigma^2(\mathcal{X}, t)$ . Functions  $\mu^H(\mathcal{X}, t)$  and  $V^H(\mathcal{X}, t)$  can consequently be selected to alter the variance from  
1246 one time step or age to the next.

1247 The further the distribution  $N(\mathcal{X}, t)$  departs from normality, the more approximate these equal-  
1248 ities will become. However, large departures from these equalities can be used to increase the mean  
1249 or variance of any distribution in a desired direction.

1250 In Figure S1 we show how  $\mu^H(\mathcal{X}, t)$  and  $V^H(\mathcal{X}, t)$  can be parameterized to modify the mean  
1251 and variance of  $N(\mathcal{X}, t)$  when it is proportional to a normal distribution.

## 1252 1.5 mortality selection and changes in the mean phenotype

1253 When a trait is normally distribution, selection needs to be strong in order to substantially shift the  
1254 mean of a phenotype distribution. Such strong selection inevitably leads to a decrease in population  
1255 size. In Figure S3 we show how killing 25% of the heaviest individuals has only a small effect on  
1256 the mean for a distribution with a mean of 0 and a standard deviation of unity. The evolutionary  
1257 response is even less if  $\mathcal{E}$  and  $\mathcal{G}$  are uncorrelated. For example, in the example in Figure S3, the  
1258 evolutionary response would be half the phenotypic response for  $h=0.5$ . In order to substantially  
1259 shift the mean of the a normal distribution via mortality selection it is necessary for the majority  
1260 of the population to die.

## 1261 Supplementary Information Figure Legends

1262 **Figure S1.** How parameterizations of transition functions for the environmental component of the  
1263 phenotype  $H(\mathcal{E}|\mathcal{E}', t)$  can be used to grow, maintain or shrink the mean and variance of  $N(\mathcal{E}, t+1)$ .  
1264 We start with a normal distribution. The initial distribution is represented with a black line in  
1265 the main figures. The inset figures in (a) to (c) shows the transition functions, with the black line  
1266 representing the function that has no effect on the location or shape of  $N(\mathcal{E}, t)$ . (a) increasing or  
1267 decreasing the intercept of  $\mu^H(\mathcal{E}, t)$  influences the location, but not the shape of  $N(\mathcal{E}, t)$ . (b) How  
1268 altering the slope of  $\mu^H(\mathcal{E}, t)$  influences the shape of  $N(\mathcal{E}, t)$ . In this example the mean is unaffected  
1269 as the function passes through the  $x, y$  co-ordinate  $(\mathbb{E}(\mathcal{E}, t), \mathbb{E}(\mathcal{E}, t))$ . (c) how altering the intercept  
1270 of  $V^H(\mathcal{E}, t)$  influences the variance. The transition functions in the insets of (b) and (c) generate  
1271 distributions with the same means and variances (compare blue, red and black distributions in (b)  
1272 and (c)). A change in variance between  $N(\mathcal{E}, t)$  and  $N(\mathcal{E}', t+1)$  achieved by altering the slope  
1273 of  $\mu^H(\mathcal{E}, t)$  or the intercept of  $V^H(\mathcal{E}, t)$  generates different amounts of mixing. In (d) upper and  
1274 lower  $H(\mathcal{E}'|\mathcal{E}, t)$  functions impact the variance to the same extend (left hand figures) except the red

1275 function simply spreads out the distribution without altering the relative rank of each individual.

1276 In contrast, the blue function changes relative ranks (right hand figures).

1277 **Figure S2.** Dynamics of the additive genetic variance (a)-(c) and the heritability (d)-(f) in models

1278 I to K. Models of the additive genetic (back line) and environmental (red line) variance (g)-(i)

1279 and the heritability (j)-(l) in models L to N. See Figure 5 main paper for dynamics of means and

1280 population growth.

1281 **Figure S3.** A normal distribution with mean 0 and standard deviation 1 prior to mortality

1282 selection (black line). Mortality occurs, killing off the top 25% of individuals (red distribution).

1283 The mean changes from 0 (vertical dashed line) to -0.0324. In other words, even a large highly

1284 selective mortality event has a relatively small effect on the mean of a normal distribution.

Figure S1

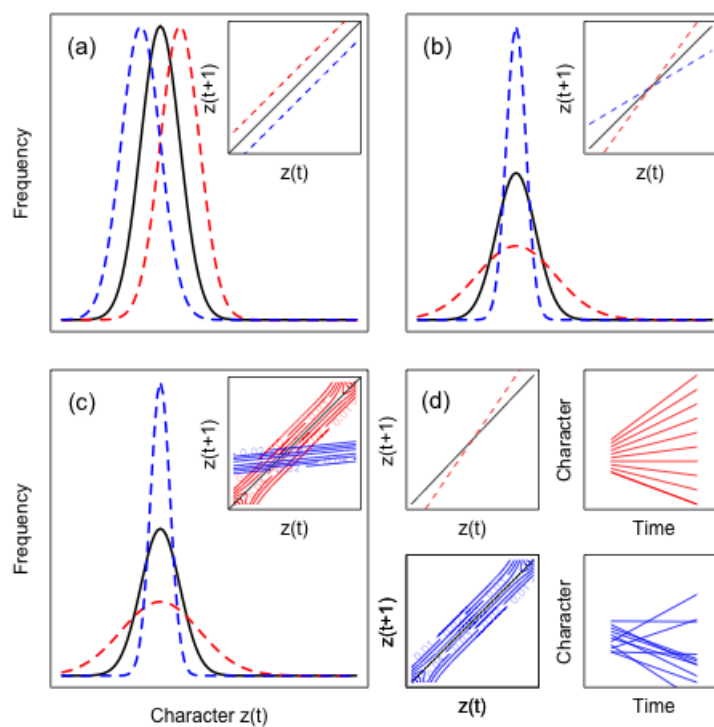

Figure S2

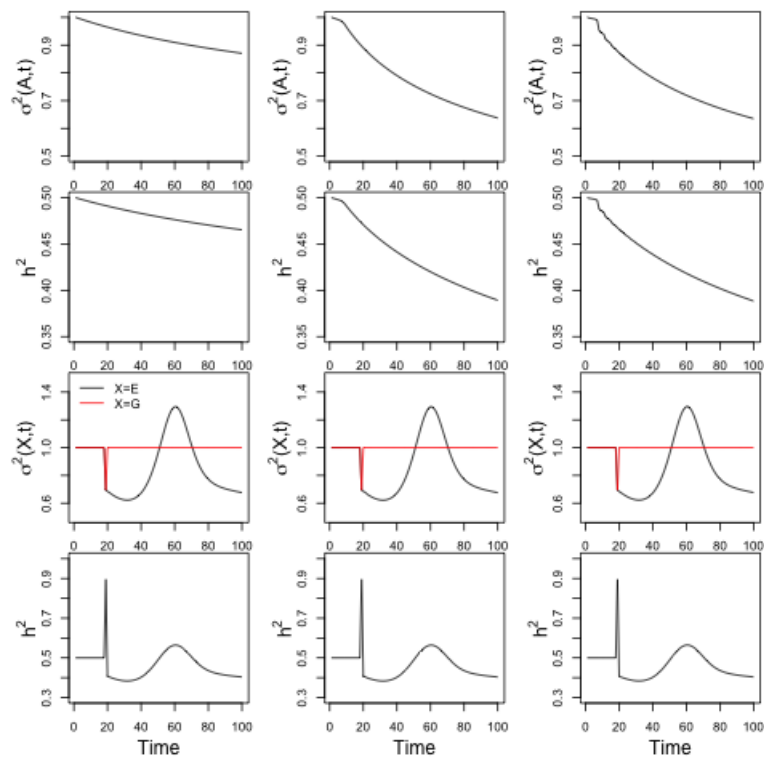

Figure S3

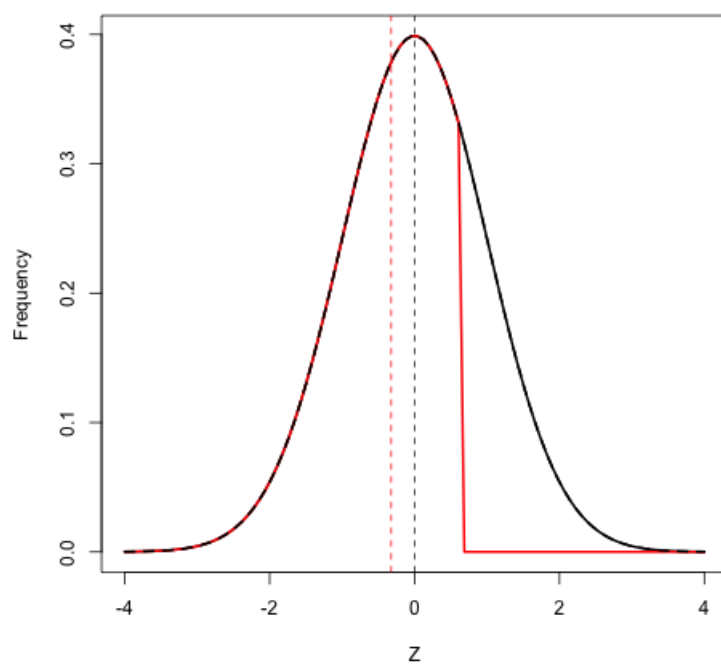

Source: http://biorxiv.org/content/10.1101/090894v3.full.pdf
